# Supplementary material for: Analysis of potential roles of combinatorial microRNA regulation in occurrence of valvular heart disease with atrial fibrillation based on computational evidences
Source: PubMed Central journal article supplement (PMC6719876; doi:10.1371/journal.pone.0221900), 2019-09-03
Supplement: pone.0221900.s001.pdf [file pone.0221900.s001.pdf]

**S1 Table 47 DE miRNAs and the change of connection**

| <b>No.</b> | <b>miRNA symbol</b>   | <b>Change of connection degree</b> |
|------------|-----------------------|------------------------------------|
| 1          | hsa-let-7b            | 0                                  |
| 2          | hsa-let-7c            | 3                                  |
| 3          | hsa-let-7f            | 2                                  |
| 4          | <b>hsa-miR-1</b>      | 3                                  |
| 5          | <b>hsa-miR-101</b>    | 4                                  |
| 6          | hsa-miR-10a           | 0                                  |
| 7          | <b>hsa-miR-10b</b>    | 3                                  |
| 8          | <b>hsa-miR-1238</b>   | 2                                  |
| 9          | <b>hsa-miR-1260</b>   | 1                                  |
| 10         | hsa-miR-129-3p        | 0                                  |
| 11         | <b>hsa-miR-133a</b>   | 7                                  |
| 12         | <b>hsa-miR-133b</b>   | 3                                  |
| 13         | hsa-miR-135a          | 0                                  |
| 14         | <b>hsa-miR-136</b>    | 2                                  |
| 15         | hsa-miR-143           | 0                                  |
| 16         | <b>hsa-miR-15b</b>    | 1                                  |
| 17         | <b>hsa-miR-16</b>     | 1                                  |
| 18         | <b>hsa-miR-181b</b>   | 1                                  |
| 19         | hsa-miR-193a-3p       | 0                                  |
| 20         | hsa-miR-200b          | 0                                  |
| 21         | hsa-miR-203           | 0                                  |
| 22         | <b>hsa-miR-208a</b>   | 2                                  |
| 23         | <b>hsa-miR-21</b>     | 1                                  |
| 24         | <b>hsa-miR-214</b>    | 1                                  |
| 25         | <b>hsa-miR-22</b>     | 5                                  |
| 26         | hsa-miR-223           | 0                                  |
| 27         | hsa-miR-25            | 0                                  |
| 28         | <b>hsa-miR-27b</b>    | 3                                  |
| 29         | <b>hsa-miR-29b</b>    | 4                                  |
| 30         | hsa-miR-29c           | 0                                  |
| 31         | <b>hsa-miR-30a</b>    | 2                                  |
| 32         | <b>hsa-miR-30d</b>    | 3                                  |
| 33         | <b>hsa-miR-30e</b>    | 5                                  |
| 34         | <b>hsa-miR-32</b>     | 1                                  |
| 35         | <b>hsa-miR-335</b>    | 1                                  |
| 36         | <b>hsa-miR-361-3p</b> | 2                                  |
| 37         | <b>hsa-miR-362-5p</b> | 1                                  |
| 38         | <b>hsa-miR-365</b>    | 2                                  |
| 39         | <b>hsa-miR-370</b>    | 2                                  |
| 40         | <b>hsa-miR-378</b>    | 2                                  |
| 41         | <b>hsa-miR-409-3p</b> | 1                                  |
| 42         | <b>hsa-miR-410</b>    | 2                                  |
| 43         | hsa-miR-424           | 0                                  |
| 44         | hsa-miR-497           | 0                                  |
| 45         | hsa-miR-663           | 0                                  |
| 46         | hsa-miR-96            | 0                                  |
| 47         | <b>hsa-miR-98</b>     | 1                                  |

**MiRNAs indicated in bold have non zero change of connection degree.**
