# Supplementary material for: Analysis of potential roles of combinatorial microRNA regulation in occurrence of valvular heart disease with atrial fibrillation based on computational evidences
Source: PubMed Central journal article supplement (PMC6719876; doi:10.1371/journal.pone.0221900), 2019-09-03
Supplement: pone.0221900.s003.pdf [file pone.0221900.s003.pdf]

**S3 Table Sequences of the primers used in the qRT-PCR validation.**

| Primer name                                                 | Primer sequence                                                                                                                | Annealing temperature (°C) | Product length (bp) |
|-------------------------------------------------------------|--------------------------------------------------------------------------------------------------------------------------------|----------------------------|---------------------|
| U6 RT<br>U6: Forward<br>U6: Reverse                         | 5'CGCTTCACGAATTTGCGTGTCAT3'<br>5'GCTTCGGCAGCACATATACTAAAAT 3'<br>5'CGCTTCACGAATTTGCGTGTCAT 3'                                  | 60                         | 89                  |
| hsa-miR-32-5p RT<br>hsa-miR-32-5p: F<br>hsa-miR-32-5p: R    | 5'GTCGTATCCAGTGC GTGGAGT<br>CGGCAATTGCACTGGATACGACTGCAA<br>CT 3'<br>5' GGGGCTATTGCACATTACTA 3'<br>5' GTGCGTGTCGTGGAGTCG 3'     | 60                         | 67                  |
| hsa-miR-98-5p RT<br>hsa-miR-98-5p: F<br>hsa-miR-98-5p: R    | RT:5'GTCGTATCCAGTGC GTGGAGT<br>GTCGGCAATTGCACTGGATACGACAAC<br>AAT3'<br>5' GGGGGTGAGGTAGTAAGTTGT 3'<br>5' GTGCGTGTCGTGGAGTCG 3' | 60                         | 67                  |
| hsa-miR-30e-5p RT<br>hsa-miR-30e-5p: F<br>hsa-miR-30e-5p: R | 5'GTCGTATCCAGTGC GTGGAGT<br>CGGCAATTGCACTGGATACGACCTTCC<br>A 3'<br>5' GGGTGTAACATCCTTGAC 3'<br>5' GTGCGTGTCGTGGAGTCG 3'        | 60                         | 62                  |
