# Supplementary material for: Analysis of potential roles of combinatorial microRNA regulation in occurrence of valvular heart disease with atrial fibrillation based on computational evidences
Source: PubMed Central journal article supplement (PMC6719876; doi:10.1371/journal.pone.0221900), 2019-09-03
Supplement: pone.0221900.s004.pdf [file pone.0221900.s004.pdf]

**S4 Table qRT-PCR experiment results**

The experiment with U6 as a reference and sample 1 as a benchmark is corrected as follows:

| Type              | No. of Sample | U6     | hsa-miR-32-5p  | (hsa-miR-32-5p)Ct-(U6)Ct  | [(hsa-miR-32-5p)Ct-(U6)Ct]sample-[(hsa-miR-32-5p)Ct-(U6)Ct]sample1   | $2^{-\Delta\Delta CT}$ | Average $2^{-\Delta\Delta CT}$ |
|-------------------|---------------|--------|----------------|---------------------------|----------------------------------------------------------------------|------------------------|--------------------------------|
| VHD               | 1             | 14.412 | 27.812         | 13.400                    | 0.000                                                                | 1.000                  | 1.260                          |
|                   | 2             | 14.581 | 27.153         | 12.572                    | -0.828                                                               | 1.775                  |                                |
|                   | 3             | 14.707 | 27.491         | 12.783                    | -0.617                                                               | 1.533                  |                                |
|                   | 4             | 14.449 | 27.765         | 13.316                    | -0.084                                                               | 1.060                  |                                |
|                   | 5             | 14.609 | 27.692         | 13.083                    | -0.317                                                               | 1.246                  |                                |
|                   | 6             | 14.753 | 28.238         | 13.485                    | 0.085                                                                | 0.943                  |                                |
| AF-VHD            | I             | 14.603 | 28.103         | 13.500                    | 0.100                                                                | 0.933                  | 0.622                          |
|                   | II            | 14.071 | 28.538         | 14.467                    | 1.067                                                                | 0.477                  |                                |
|                   | III           | 14.523 | 28.627         | 14.104                    | 0.704                                                                | 0.614                  |                                |
|                   | IV            | 14.320 | 28.131         | 13.811                    | 0.411                                                                | 0.752                  |                                |
|                   | V             | 14.558 | 28.852         | 14.294                    | 0.894                                                                | 0.538                  |                                |
|                   | VI            | 14.527 | 29.189         | 14.662                    | 1.262                                                                | 0.417                  |                                |
| Ratio(AF-VHD/VHD) |               |        |                |                           |                                                                      |                        | 0.494                          |
| Pvalue            |               |        |                |                           |                                                                      |                        | 0.00221                        |
|                   |               |        |                |                           |                                                                      |                        |                                |
| Type              | No. of Sample | U6     | hsa-miR-98-5p  | (hsa-miR-98-5p)Ct-(U6)Ct  | [(hsa-miR-98-5p)Ct-(U6)Ct]sample-[(hsa-miR-98-5p)Ct-(U6)Ct]sample1   | $2^{-\Delta\Delta CT}$ | Average $2^{-\Delta\Delta CT}$ |
| VHD               | 1             | 14.412 | 27.097         | 12.685                    | 0.000                                                                | 1.000                  | 1.344                          |
|                   | 2             | 14.581 | 26.403         | 11.822                    | -0.863                                                               | 1.819                  |                                |
|                   | 3             | 14.707 | 26.841         | 12.134                    | -0.551                                                               | 1.465                  |                                |
|                   | 4             | 14.449 | 26.770         | 12.322                    | -0.363                                                               | 1.286                  |                                |
|                   | 5             | 14.609 | 26.763         | 12.153                    | -0.532                                                               | 1.446                  |                                |
|                   | 6             | 14.753 | 27.366         | 12.613                    | -0.072                                                               | 1.051                  |                                |
| AF-VHD            | I             | 14.603 | 27.168         | 12.565                    | -0.120                                                               | 1.087                  | 0.652                          |
|                   | II            | 14.071 | 27.875         | 13.804                    | 1.119                                                                | 0.461                  |                                |
|                   | III           | 14.523 | 28.148         | 13.625                    | 0.940                                                                | 0.521                  |                                |
|                   | IV            | 14.320 | 27.827         | 13.507                    | 0.822                                                                | 0.566                  |                                |
|                   | V             | 14.558 | 27.516         | 12.958                    | 0.273                                                                | 0.827                  |                                |
|                   | VI            | 14.527 | 28.365         | 13.838                    | 1.153                                                                | 0.450                  |                                |
| Ratio(AF-VHD/VHD) |               |        |                |                           |                                                                      |                        | 0.485                          |
| Pvalue            |               |        |                |                           |                                                                      |                        | 0.00157                        |
|                   |               |        |                |                           |                                                                      |                        |                                |
| Type              | No. of Sample | U6     | hsa-miR-30e-5p | (hsa-miR-30e-5p)Ct-(U6)Ct | [(hsa-miR-30e-5p)Ct-(U6)Ct]sample-[(hsa-miR-30e-5p)Ct-(U6)Ct]sample1 | $2^{-\Delta\Delta CT}$ | Average $2^{-\Delta\Delta CT}$ |
| VHD               | 1             | 14.412 | 17.403         | 2.991                     | 0.000                                                                | 1.000                  | 1.451                          |
|                   | 2             | 14.581 | 16.998         | 2.417                     | -0.574                                                               | 1.489                  |                                |
|                   | 3             | 14.707 | 16.761         | 2.053                     | -0.938                                                               | 1.915                  |                                |
|                   | 4             | 14.449 | 16.964         | 2.515                     | -0.476                                                               | 1.391                  |                                |
|                   | 5             | 14.609 | 16.780         | 2.170                     | -0.821                                                               | 1.766                  |                                |
|                   | 6             | 14.753 | 17.551         | 2.798                     | -0.193                                                               | 1.143                  |                                |
| AF-VHD            | I             | 14.603 | 17.401         | 2.798                     | -0.193                                                               | 1.143                  | 0.824                          |
|                   | II            | 14.071 | 17.149         | 3.078                     | 0.087                                                                | 0.942                  |                                |
|                   | III           | 14.523 | 18.643         | 4.120                     | 1.129                                                                | 0.457                  |                                |
|                   | IV            | 14.320 | 17.556         | 3.236                     | 0.245                                                                | 0.844                  |                                |
|                   | V             | 14.558 | 17.716         | 3.158                     | 0.167                                                                | 0.891                  |                                |
|                   | VI            | 14.527 | 18.103         | 3.576                     | 0.585                                                                | 0.667                  |                                |
| Ratio(AF-VHD/VHD) |               |        |                |                           |                                                                      |                        | 0.568                          |
| Pvalue            |               |        |                |                           |                                                                      |                        | 0.00467                        |
