# Supplementary material for: Analysis of potential roles of combinatorial microRNA regulation in occurrence of valvular heart disease with atrial fibrillation based on computational evidences
Source: PubMed Central journal article supplement (PMC6719876; doi:10.1371/journal.pone.0221900), 2019-09-03
Supplement: pone.0221900.s005.pdf [file pone.0221900.s005.pdf]

**S5 Table The target genes of combinatorial miRNAs**

| combination | MicroRNA target prediction |          |
|-------------|----------------------------|----------|
|             | MicroRNA                   | Gene     |
|             | hsa-let-7c                 | PPP1R15B |
|             |                            | BACH1    |
|             |                            | E2F6     |
|             |                            | AKAP6    |
|             |                            | ACTA1    |
|             |                            | BTBD3    |
|             |                            | THBS1    |
|             | hsa-miR-10b                | NCOR2    |
|             |                            | DAZAP1   |
|             |                            | ZNF367   |
|             |                            | DOCK11   |
|             |                            | FXR2     |
|             |                            | ELAVL2   |
|             |                            | ARIH2    |
|             |                            | HOXA1    |
|             |                            | NR4A3    |
|             |                            | CECR6    |
|             |                            | GRIN3A   |
|             |                            | MTMR3    |
|             |                            | LPHN1    |
|             | BCL2L2                     |          |
|             | hsa-miR-27b                | RPS6KA5  |
|             |                            | C5orf13  |
|             |                            | TXN2     |
|             |                            | CD28     |
|             |                            | PPARG    |
|             |                            | CCNG1    |
|             |                            | ADD3     |
|             |                            | NCOA7    |
|             |                            | VAV3     |
|             |                            | POM121   |
|             |                            | KITLG    |
|             |                            | SLC38A4  |
|             |                            | PHB      |
|             |                            | KIAA1737 |
|             |                            | CDK5R1   |
| NHS         |                            |          |
| XPO1        |                            |          |
| ST14        |                            |          |
| HOXC11      |                            |          |
| INSR        |                            |          |
| ANTXR2      |                            |          |
| PLEKHJ1     |                            |          |
| SEMA3B      |                            |          |

|         |
|---------|
| ADAM22  |
| STIM2   |
| BAZ2B   |
| RAP2C   |
| UBE2J1  |
| YTHDF3  |
| FAM43A  |
| ZNF644  |
| STK39   |
| ZNRF1   |
| CA10    |
| CADPS   |
| CHD7    |
| GOLGA4  |
| GABRA5  |
| ADAM19  |
| TRPM7   |
| ZDHHC21 |
| USP48   |
| USP37   |
| BECN1   |
| RAP1B   |
| PAWR    |
| COL13A1 |
| FOXD1   |
| CALU    |
| PTPN2   |
| ELL2    |
| SOX4    |
| IL1A    |
| SOCS3   |
| INSIG2  |
| SOCS1   |
| ARID1A  |
| ERG     |
| CAMTA1  |
| CALCR   |
| JPH4    |
| PSMD7   |
| ADAMTS9 |
| NR5A2   |
| MAP3K5  |
| MEIS2   |
| SNAI1   |
| EML4    |
| DLL4    |
| FBXL17  |

hsa-miR-30a

|          |
|----------|
| SNAI2    |
| ZDHHC17  |
| GLDC     |
| SORCS3   |
| YWHAZ    |
| SATB2    |
| GALNT3   |
| SEMA6D   |
| HIC2     |
| AP2A1    |
| DDIT4    |
| RUNX1    |
| PDE4D    |
| DMD      |
| MAP3K12  |
| SLC38A2  |
| CLOCK    |
| CAMK2D   |
| SLC7A10  |
| NRIP1    |
| POU4F2   |
| CARS     |
| GRM5     |
| PDCL     |
| SLC4A7   |
| FBXL20   |
| ACTR1A   |
| SGCB     |
| BNC1     |
| SATB1    |
| STC1     |
| NAGPA    |
| MYBL2    |
| HOXA11   |
| EPHB2    |
| EAF1     |
| RAI14    |
| SMARCD2  |
| ICK      |
| FLJ36031 |
| NRK      |
| NFIB     |
| IGF2R    |
| TIMP3    |
| NEDD4L   |
| IDH1     |
| LPP      |

|          |
|----------|
| DEXI     |
| TSGA14   |
| EIF5A2   |
| UNC5D    |
| STK35    |
| EFNA3    |
| ADRB1    |
| CCPG1    |
| USP44    |
| CPEB4    |
| ITGB3    |
| CSNK1G1  |
| EIF2C1   |
| TNXB     |
| COPS7B   |
| MBD6     |
| THBS2    |
| IER2     |
| ESRRG    |
| TP53INP1 |
| ATP2A2   |
| CECR6    |
| RASL12   |
| ARID3A   |
| MEF2D    |
| SLC6A15  |
| SLC36A1  |
| SCAMP1   |
| NAV3     |
| CAMKK2   |
| ELMO1    |
| FXR1     |
| NR2F2    |
| MKL2     |
| DDX46    |
| MAN1B1   |
| PITX1    |
| BACH1    |
| NR3C2    |
| ARHGEF3  |
| PDP2     |
| RASGEF1A |
| CRKL     |
| EGR3     |
| PLXNA1   |
| KLF12    |
| DIO2     |

|              |          |
|--------------|----------|
|              | PLCG1    |
|              | FOXA1    |
|              | BCL2     |
|              | JUNB     |
|              | ROD1     |
|              | BNC2     |
|              | NCALD    |
|              | SLC1A2   |
|              | MECP2    |
|              | BCL11A   |
|              | HIPK1    |
|              | FOXP4    |
|              | SIAH2    |
|              | B4GALT5  |
|              | RASAL2   |
|              | CHFR     |
|              | FRMD4A   |
|              | CORO2A   |
|              | AP3M1    |
|              | NAV1     |
|              | SNX27    |
|              | DCP2     |
|              | BACH2    |
| hsa-miR-30d  | SUPT3H   |
|              | KCTD5    |
|              | HSPA5    |
|              | SBF1     |
| hsa-miR-133b | PPP2CB   |
|              | PDIA4    |
|              | FOXG1    |
|              | NPAS4    |
|              | NEUROD1  |
|              | SPEG     |
|              | C5orf41  |
|              | TOB2     |
|              | C16orf72 |
|              | H3F3B    |
|              | CD3G     |
|              | SLC2A1   |
|              | PAPOLG   |
|              | CHIT1    |
|              | RRP1B    |
|              | SFT2D3   |
|              | ARRDC2   |
|              | XPNPEP3  |
|              | RPL23A   |
|              | SOX7     |

hsa-miR-378

|           |
|-----------|
| MREG      |
| PDIK1L    |
| HDAC4     |
| CRLF3     |
| PAPOLA    |
| CACNA2D4  |
| TLK2      |
| PAPPA     |
| XPO5      |
| MAPK1     |
| DLAT      |
| ZNF507    |
| TRIL      |
| SAR1A     |
| RIT1      |
| FZD5      |
| KPNA6     |
| ANKRD52   |
| MKL2      |
| MEF2D     |
| RNF41     |
| SLC30A8   |
| SARM1     |
| MAPK11P1L |
| DDX3X     |
| IGF1      |
| CALN1     |
| WDR37     |
| SEC63     |
| MNT       |
| NUFIP2    |
| SLC38A1   |
| LDLRAD2   |
| TFCP2L1   |
| SETD8     |
| CBX5      |
| OTUD7B    |
| DBT       |
| ELFN2     |
| MTF1      |
| AAK1      |
| MED13L    |
| RNF41     |
| PTBP2     |
| BZRAP1    |
| UGT1A10   |
| UGT1A8    |

|          |
|----------|
| UGT1A7   |
| UGT1A6   |
| UGT1A5   |
| UGT1A9   |
| UGT1A4   |
| UGT1A1   |
| UGT1A3   |
| CSNK2B   |
| UNC13C   |
| LARP1B   |
| NT5C2    |
| MSTO1    |
| BTBD11   |
| EIF2C1   |
| CSRNP2   |
| SEMA3A   |
| RELT     |
| C17orf59 |
| WIBG     |
| GPKOW    |
| XKR6     |
| CC2D1B   |
| C14orf1  |
| KCNIP1   |
| RNF146   |
| LHFPL1   |
| PRDM4    |
| TIMM17A  |
| TDRD9    |
| ZNF629   |
| CUX1     |
| C2orf84  |
| WNT10B   |
| PTPRU    |
| INPP5A   |
| AMBRA1   |
| HMI3     |
| ZNF594   |
| GJA5     |
| GLP1R    |
| NRXN2    |
| HMX2     |
| C1orf63  |
| FXR2     |
| PPP1R8   |
| ZHX2     |
| CALU     |

|          |
|----------|
| TARDBP   |
| BSDC1    |
| EMX1     |
| ZBTB6    |
| C22orf29 |
| POU3F1   |
| SORT1    |
| CYTIP    |
| UBE2E1   |
| LRRTM4   |
| WDR82    |
| AK2      |
| STMN4    |
| PGM5     |
| PIP5K1A  |
| SMOC1    |
| RACGAP1  |
| ZNF544   |
| DBN1     |
| TAF15    |
| DNAJB1   |
| NUMA1    |
| CHRM1    |
| TAOK2    |
| TCF20    |
| FOXMI    |
| IPPK     |
| MLL4     |
| KDM4A    |
| N4BP3    |
| C6orf132 |
| TBX4     |
| FAM120C  |
| DCBLD2   |
| SRRM2    |
| ACCN1    |
| SLA2     |
| GREM2    |
| ELK1     |
| GRRP1    |
| UBTF     |
| SP6      |
| TAL1     |
| WTAP     |
| ERLIN1   |
| ZNF48    |
| NPAS4    |



hsa-miR-1260

|          |
|----------|
| AFF3     |
| PTPN11   |
| ATP2B1   |
| ASH1L    |
| KCTD12   |
| FAM109B  |
| GNPNAT1  |
| CDK16    |
| PLEK     |
| STAG2    |
| FXR1     |
| POGZ     |
| ETS2     |
| RNF121   |
| BBC3     |
| SCD      |
| PTGFRN   |
| LAMC2    |
| MLL2     |
| ZNF385A  |
| ZNF763   |
| RNF123   |
| KIAA1161 |
| SYNM     |
| ZNF781   |
| ETV1     |
| SLC16A3  |
| LDOC1L   |
| ZNF740   |
| SREBF2   |
| CD8A     |
| KLHDC7A  |
| SH3BP5   |
| PI4KB    |
| MMP16    |
| TMEM104  |
| TNPO3    |
| DIXDC1   |
| VAMP1    |
| ZNF814   |
| C6orf195 |
| FLT1     |
| DCLK1    |
| DLG2     |
| ETS1     |
| SMYD4    |
| MGLL     |

Sub 1

|          |
|----------|
| SEMA4F   |
| HOXB5    |
| SUPT4H1  |
| ZNF559   |
| ZNF541   |
| JPH2     |
| CCDC117  |
| ATXN7L3  |
| HOXC10   |
| FBXL19   |
| NCOR2    |
| C12orf53 |
| XPR1     |
| HAS3     |
| SURF4    |
| EFNB1    |
| TSC22D4  |
| RAP2B    |
| LIMD2    |
| KNCN     |
| SMARCD1  |
| PER1     |
| ST3GAL3  |
| HOXB13   |
| COL1A1   |
| RAPGEFL1 |
| ZNF428   |
| RAB42    |
| ELAVL3   |
| GATAD2B  |
| PLCXD3   |
| HOXB9    |
| RPS6KA3  |
| DENND1A  |
| ATP8B1   |
| KDM6B    |
| BTRC     |
| SUFU     |
| PDXK     |
| AFF4     |
| MEX3A    |
| CD83     |
| CCDC93   |
| CCR5     |
| SCRN1    |
| SF3B3    |
| GABI     |

|          |
|----------|
| DPYSL3   |
| ELL2     |
| SFN      |
| PRKACA   |
| GLT25D2  |
| WWC3     |
| KPNA6    |
| RBMS2    |
| PTPN3    |
| ZFHX2    |
| ANP32A   |
| USP27X   |
| CENPP    |
| SLC2A4   |
| GRB2     |
| DHRS7B   |
| CRKL     |
| SLC31A1  |
| CUL2     |
| ZBTB46   |
| IGF2BP1  |
| AP3M1    |
| NFIX     |
| CNOT6L   |
| LRRC55   |
| NFIB     |
| LHFPL4   |
| SLC30A5  |
| FZD4     |
| PIGK     |
| SOX12    |
| GAB2     |
| EIF2S1   |
| ZNF266   |
| PGP      |
| NPTX1    |
| MXD4     |
| NEUROG2  |
| SIK2     |
| MYO5B    |
| B3GALNT2 |
| SLA      |
| CNKSR2   |
| SESTD1   |
| ANTXR2   |
| MAPRE2   |
| ZFP3     |

|           |
|-----------|
| MMP15     |
| GJB4      |
| ZNF780B   |
| PHF21A    |
| WIZ       |
| FASN      |
| ZNF260    |
| AGPS      |
| DCAF7     |
| ENAH      |
| INO80D    |
| GABRA4    |
| VANGL1    |
| KLHL24    |
| C10orf114 |
| PRKCA     |
| CCDC97    |
| TNRC6B    |
| SLC7A8    |
| TFE3      |
| QKI       |
| PPP2R5D   |
| BCL2L1    |
| ARFIP2    |
| ADCY6     |
| FGFR1     |
| ALDH5A1   |
| EIF2C1    |
| ZNF436    |
| SENP1     |
| SYNPO2L   |
| SLC6A6    |
| NIPA1     |
| FOXP4     |
| C16orf5   |
| KPNA6     |
| TTYH3     |
| FBXL19    |
| HIC2      |
| JDP2      |
| C10orf46  |
| NFAT5     |
| WHSC2     |
| SP1       |
| NLGN2     |
| SNX1      |
| LHFP      |

hsa-miR-133a

|          |
|----------|
| SLC6A1   |
| UBA2     |
| NUP153   |
| SGPP1    |
| CLTA     |
| PTPRZ1   |
| VPS54    |
| EIF4A1   |
| SEC61B   |
| SMARCD1  |
| PPP2CA   |
| SOX4     |
| SUMO1    |
| PTPRO    |
| TIMM17A  |
| GPM6A    |
| SH3GL2   |
| SNRK     |
| SEPHS2   |
| BAZ2A    |
| FTL      |
| SP3      |
| TFAP2D   |
| PTBP2    |
| PFN2     |
| BNIP3L   |
| TBPL1    |
| RARB     |
| RAP2C    |
| GCH1     |
| EPHA7    |
| ADCYAP1  |
| PEX5L    |
| MEIS2    |
| SACMIL   |
| VAMP2    |
| SYT1     |
| AKAP9    |
| CRTAM    |
| CSNK1G3  |
| ARHGAP12 |
| KCNMA1   |
| ATP6AP2  |
| TMOD3    |
| FBXW11   |
| BTBD3    |
| SOLH     |

|           |
|-----------|
| DOLPP1    |
| LASP1     |
| TRHDE     |
| FBXL2     |
| MTMR4     |
| RB1CC1    |
| RAVER1    |
| SV2A      |
| ANKRD12   |
| LRRC7     |
| FOXL2     |
| MAML1     |
| SLC4A1    |
| MCL1      |
| PAN3      |
| GRM5      |
| USP32     |
| PTPRD     |
| MEIS1     |
| GDI2      |
| ELAVL1    |
| YES1      |
| TCF7      |
| SUPT16H   |
| BCORL1    |
| RAPH1     |
| ARHGDI1A  |
| JAZF1     |
| CRK       |
| CASC3     |
| RCE1      |
| TRAM2     |
| ELF2      |
| NDRG1     |
| XPO4      |
| MLLT3     |
| BCL2L2    |
| PRDM16    |
| USP6      |
| PPFIA3    |
| MAP3K3    |
| GABARAPL1 |
| NRIP3     |
| VAPB      |
| SESN1     |
| CD47      |
| PFKFB3    |

|          |
|----------|
| PREX1    |
| WASF1    |
| H3F3B    |
| RBM15    |
| AKT3     |
| NET1     |
| ARPC5    |
| GATM     |
| FAM49B   |
| SEPHS1   |
| STK39    |
| CPEB1    |
| CHD9     |
| BOLL     |
| OGN      |
| RGS2     |
| SIRT1    |
| STAG2    |
| POGK     |
| CHD7     |
| MAX      |
| RAB5B    |
| LRRC1    |
| PTEN     |
| IL13RA1  |
| TRIB2    |
| SATB2    |
| CDX2     |
| HOXA4    |
| LAMC1    |
| TRUB1    |
| RSBN1    |
| FMNL2    |
| FNBP4    |
| CSF1R    |
| RFXANK   |
| CALCR    |
| TYRO3    |
| EMILIN3  |
| COPS7B   |
| DNM3     |
| MAPK14   |
| FBXL19   |
| EP300    |
| ERBB3    |
| CAV3     |
| TP53INP1 |

hsa-miR-22

|          |
|----------|
| LIN7C    |
| PPP1R15B |
| AMOT     |
| PTPN9    |
| SMAP1    |
| ODF1     |
| ESR1     |
| ARFIP2   |
| FBXW7    |
| ZFYVE9   |
| JARID2   |
| NDEL1    |
| MAP3K12  |
| NUDT4    |
| SNRK     |
| BCL9L    |
| BCL9     |
| MTHFD2   |
| KIAA1274 |
| NR3C1    |
| FBN2     |
| DNAJB5   |
| SV2A     |
| DPP10    |
| EPC1     |
| FOSL1    |
| BTG1     |
| WDTC1    |
| DPF2     |
| IPO7     |
| PTPN1    |
| CUL3     |
| DPYSL3   |
| PLEKHA6  |
| SLC2A1   |
| SLC16A2  |
| SLC1A3   |
| RAPGEFL1 |
| RIMS4    |
| PHF13    |
| GALNT4   |
| TAGLN    |
| DGKI     |
| CALM3    |
| WDFY3    |
| HSPG2    |
| SLC9A5   |



|           |
|-----------|
| IL17RD    |
| PURB      |
| BIN1      |
| NFYA      |
| MXD4      |
| LGALS1    |
| ASB6      |
| CDKN1A    |
| ARID3B    |
| KIAA0355  |
| USP37     |
| TLK2      |
| KCNK10    |
| TTYH3     |
| ZCCHC8    |
| ARHGEF12  |
| MAP3K3    |
| PPP1R16B  |
| SLC17A5   |
| MECP2     |
| FURIN     |
| MBP       |
| MAPK8IP3  |
| USP46     |
| HDAC4     |
| ULK2      |
| C20orf112 |
| SP1       |
| PPARA     |
| PTPN13    |
| WDR7      |
| UBE2V2    |
| LRRC17    |
| PAPD4     |
| LPPR4     |
| NT5E      |
| PRDM1     |
| NAALADL2  |
| HLF       |
| DOLPP1    |
| CCNT2     |
| ATP2B1    |
| ELOVL5    |
| SCN3A     |
| NR4A2     |
| UBE2I     |
| LGI1      |

hsa-miR-30e

|           |
|-----------|
| PAPOLA    |
| CAPZA1    |
| ADAMTS3   |
| PFN2      |
| CHST2     |
| NRXN3     |
| C9orf72   |
| FAP       |
| RAB15     |
| PCDH17    |
| UNC5C     |
| RAB32     |
| BNIP3L    |
| RAB11A    |
| ADAM9     |
| AP4E1     |
| FRMPD1    |
| SLC5A11   |
| GATM      |
| EIF2C3    |
| IRS1      |
| CTNND2    |
| MMD       |
| NRP2      |
| PON2      |
| PAPOLB    |
| NHLH2     |
| RAB38     |
| LPHN3     |
| DHX40     |
| PPARGC1B  |
| PTP4A1    |
| PDCD10    |
| PPARGC1A  |
| PGM1      |
| CBFB      |
| C20orf108 |
| GFPT2     |
| RHEBL1    |
| CALB2     |
| E2F3      |
| SSBP2     |
| GJA1      |
| ABL1      |
| SIRT1     |
| KIAA0355  |
| PLS1      |

|  |          |
|--|----------|
|  | ESPN     |
|  | GTF2H1   |
|  | CNTN4    |
|  | SEMA6B   |
|  | RGL1     |
|  | RNF122   |
|  | TAB3     |
|  | PRICKLE1 |
|  | ITPK1    |
|  | PPP3CB   |
|  | KCTD3    |
|  | NRBF2    |
|  | KCTD7    |
|  | CAPN5    |
|  | SEC61A2  |
|  | JDP2     |
|  | VAT1     |
|  | TBPL1    |
|  | TRPS1    |
|  | EYA2     |
|  | TUBGCP3  |
|  | PDGFRB   |
|  | PGGT1B   |
|  | NFAT5    |
|  | BDNF     |
|  | OSBPL8   |
|  | SOX12    |
|  | GPT2     |
|  | PLCB4    |
|  | IRX4     |
|  | GOT2     |
|  | PLCXD3   |
|  | SLC6A6   |
|  | COTL1    |
|  | PHF13    |
|  | HMGB3    |
|  | SLC39A11 |
|  | PTPN21   |

|  |          |
|--|----------|
|  | GJA1     |
|  | DHX15    |
|  | MET      |
|  | HS3ST3B1 |
|  | CXorf23  |
|  | ANXA4    |
|  | NRP1     |
|  | GNPDA2   |

hsa-miR-1

|           |
|-----------|
| EIF4E     |
| CLCN3     |
| FBXO33    |
| CPEB1     |
| MYLK      |
| JARID2    |
| BPNT1     |
| H3F3B     |
| OSBPL7    |
| NAP1L5    |
| RARB      |
| TBC1D15   |
| MEOX2     |
| SNAP25    |
| SLC25A22  |
| HMGCR     |
| ADAM12    |
| RNF138    |
| BCL11A    |
| HOXB4     |
| UBE4A     |
| MEIS1     |
| KCTD10    |
| VAMP2     |
| ZNF146    |
| CORO1C    |
| EIF1AX    |
| BSCL2     |
| OTX2      |
| FRAS1     |
| GDF6      |
| SP2       |
| GAS2L1    |
| BOLL      |
| CORO1B    |
| STAG2     |
| C20orf112 |
| JUND      |
| SERP1     |
| SNAI2     |
| RAP1B     |
| LIN7C     |
| QKI       |
| ARF3      |
| GIT1      |
| EYA4      |
| CAP1      |

|          |
|----------|
| EAF1     |
| KCTD13   |
| SEC63    |
| PREX1    |
| SMARCA4  |
| CDK9     |
| SYT1     |
| CRIM1    |
| PAFAH1B1 |
| KLF4     |
| HDAC4    |
| KLF13    |
| BLCAP    |
| NFAT5    |
| GCLC     |
| ARHGAP21 |
| DNAJC5   |
| EIF2C1   |
| EML4     |
| CCND1    |
| DLC1     |
| CELSR3   |
| SLC38A2  |
| CCND2    |
| ATP6V1B2 |
| RIMS4    |
| SLC31A1  |
| PGAM1    |
| MAP4K2   |
| MUM1L1   |
| TRPS1    |
| NGFR     |
| GNPNAT1  |
| TFE3     |
| IGFBP5   |
| HSPE1    |
| MTX1     |
| NRP2     |
| PIMI1    |
| LETM1    |
| CDK6     |
| HIC2     |
| THR3     |
| ZFP91    |
| TBX3     |
| SLC25A1  |
| STC1     |

|          |
|----------|
| FLRT3    |
| GLTSCR1  |
| ZNF207   |
| MYCN     |
| ASPN     |
| CDYL     |
| ZFHX4    |
| ATP1B1   |
| PAPOLG   |
| RAP1B    |
| EYA1     |
| UBE2D1   |
| MYRIP    |
| MAP3K13  |
| EZH2     |
| NOVA1    |
| CAMTA1   |
| SLC12A2  |
| PRKAA1   |
| ZNF532   |
| NUDT11   |
| FOS      |
| SEL1L    |
| ZCCHC2   |
| NEUROD1  |
| CPEB3    |
| SMARCA1  |
| C20orf20 |
| APP      |
| SOCS5    |
| ERBB2IP  |
| MBNL1    |
| CDH11    |
| ARID1A   |
| UBE2D2   |
| PPFIA1   |
| GNB1     |
| MTMR2    |
| KHDRBS3  |
| ANKRD17  |
| ID4      |
| REV3L    |
| RANBP9   |
| KCNH7    |
| NLK      |
| BTBD3    |
| FZD6     |

|          |
|----------|
| NDVIP1   |
| FBN2     |
| GJA1     |
| DUSP1    |
| DR1      |
| RAP2C    |
| AEBP2    |
| ADAMTSL3 |
| RAB39B   |
| NRK      |
| COL10A1  |
| STMN1    |
| BICD2    |
| PBX3     |
| CDH5     |
| DCBLD2   |
| STAG2    |
| DNMT3A   |
| RAB1A    |
| SULT4A1  |
| AP3S1    |
| STIM2    |
| SOX9     |
| ZFX      |
| RAB14    |
| SACMIL   |
| PACRG    |
| BCL9     |
| SOCS2    |
| LRRN1    |
| EED      |
| CACNB2   |
| ING3     |
| KIAA1409 |
| CTTNBP2  |
| CPEB2    |
| FZD4     |
| ATRX     |
| USP38    |
| EMP1     |
| ACSL4    |
| RBBP7    |
| GPR85    |
| FGA      |
| CDK5R1   |
| MET      |
| RXRβ     |

hsa-miR-101

|          |
|----------|
| PCDH8    |
| FBXW11   |
| TOP1     |
| PTGS2    |
| MARK1    |
| USP47    |
| CBFA2T2  |
| HDGFRP3  |
| TGFBR1   |
| DAG1     |
| ATP5G2   |
| IPO8     |
| CAV3     |
| LRRFIP2  |
| SLC1A1   |
| ELF5     |
| PUM2     |
| SMARCA4  |
| TERF2    |
| RASD2    |
| RNF38    |
| ICK      |
| CTCF     |
| TULP4    |
| PHLDA1   |
| SLC19A2  |
| MKL2     |
| SMARCD1  |
| MITF     |
| FLRT2    |
| LRRC4    |
| SORCS3   |
| TRIB1    |
| MEIS2    |
| TAL1     |
| DDIT4    |
| STRN3    |
| KIAA0182 |
| DYRK1A   |
| RAC1     |
| TLK2     |
| POGZ     |
| PURB     |
| CCNJ     |
| ZNF238   |
| PNRC1    |
| KIAA1244 |



Sub 2

|          |
|----------|
| G3BP2    |
| PANK1    |
| BZW1     |
| BAZ2A    |
| ARID4B   |
| PTPN9    |
| PHF3     |
| SPRED1   |
| PDE4D    |
| BRPF1    |
| PCDH18   |
| NR2F2    |
| EPN2     |
| QKI      |
| GDF10    |
| PPP2R5E  |
| ATXN1    |
| MYO1E    |
| TEAD3    |
| ACCN2    |
| MAP3K4   |
| RBL2     |
| ZNF24    |
| SCAMP1   |
| ALDH1A3  |
| RNF139   |
| KPNA3    |
| TFAP4    |
| SHANK2   |
| RAPH1    |
| ADCY6    |
| CDC42EP3 |
| STAT6    |
| OGT      |
| FMR1     |
| CCNT2    |
| ABLIM3   |
| ATP1B2   |
| RREB1    |
| DMD      |
| TTN      |
| CPEB1    |
| ATP2B2   |
| CXCL12   |
| AMMECR1  |
| TGIF2    |
| PPP2R2A  |

|          |
|----------|
| PDE4A    |
| SLC4A4   |
| KBTBD2   |
| ABCA1    |
| CXorf23  |
| STARD8   |
| SLC25A3  |
| JUNB     |
| PIM1     |
| N4BP1    |
| C6orf62  |
| EPB41L1  |
| SGPL1    |
| SLC30A7  |
| MEF2D    |
| APLP2    |
| MGRN1    |
| RGL1     |
| RAPGEF5  |
| C13orf23 |
| HAPLN1   |
| SNN      |
| NPTX1    |
| IGFBP5   |
| EIF5     |
| PKNOX1   |
| RNF44    |
| DYRK2    |
| SRF      |
| TIMP3    |
| ETS1     |
| APPBP2   |
| RUNX1    |
| TBC1D14  |
| PPP1R16B |
| NDRG4    |
| STK4     |
| BBC3     |
| DGCR2    |
| DLC1     |
| ANTXR2   |
| SIK2     |
| ARHGAP26 |
| GRM1     |
| NANOS1   |
| LIFR     |
| MSI1     |

|  |             |          |        |
|--|-------------|----------|--------|
|  |             | ANKRD12  |        |
|  |             | KLF12    |        |
|  | hsa-miR-136 | MTMR4    |        |
|  |             | RGS4     |        |
|  |             | MTPN     |        |
|  |             | MDM1     |        |
|  |             | GLT6D1   |        |
|  |             | TRPC4AP  |        |
|  |             | RAP2C    |        |
|  |             | INO80    |        |
|  |             | ETF1     |        |
|  |             | HOXC10   |        |
|  |             | GDF6     |        |
|  |             | PPARGC1A |        |
|  |             | RNF139   |        |
|  |             | ZIC3     |        |
|  |             | ESRRG    |        |
|  |             | NOVA1    |        |
|  |             | MOSPD1   |        |
|  |             | EXTL3    |        |
|  |             | CPEB2    |        |
|  |             | PSME4    |        |
|  |             | SLC7A3   |        |
|  |             | SNRK     |        |
|  |             | ZNF436   |        |
|  |             | NRK      |        |
|  |             | GNG3     |        |
|  |             | IGFBP5   |        |
|  |             | ELK1     |        |
|  |             | USP37    |        |
|  |             | PURB     |        |
|  |             | PLCXD3   |        |
|  |             | COL3A1   | COL3A1 |
|  |             |          | HBP1   |
|  | COL15A1     |          |        |
|  | COL4A1      |          |        |
|  | ZFP36L1     |          |        |
|  | CAV2        |          |        |
|  | BCL11A      |          |        |
|  | C5orf13     |          |        |
|  | COL4A5      |          |        |
|  | ADAMTS9     |          |        |
|  | PPIC        |          |        |
|  | CCNT2       |          |        |
|  | COL2A1      |          |        |
|  | BLMH        |          |        |
|  | ADAMTS6     |          |        |

hsa-miR-29b

|          |
|----------|
| RARB     |
| COL7A1   |
| PAIP2    |
| NKRF     |
| PPM1D    |
| LAMC1    |
| CAMK2G   |
| MAFB     |
| GPX7     |
| HAS3     |
| C13orf23 |
| TFAP2C   |
| MFAP2    |
| BMF      |
| FBXW9    |
| ADAMTS7  |
| CAMK1D   |
| CNR1     |
| ARMC8    |
| TP53INP2 |
| ZBTB5    |
| HDAC4    |
| EML5     |
| PRR3     |
| BCORL1   |
| ADAMTS18 |
| PLEKHA1  |
| SS18L1   |
| SCHIP1   |
| PER3     |
| HPCAL4   |
| FRAS1    |
| IMPDH1   |
| CIQTNF6  |
| PKNOX2   |
| GNG12    |
| ZFP36    |
| SOX12    |
| PPP1R3D  |
| ENTPD7   |
| ZFP91    |
| NAV1     |
| MAP2K6   |
| BCL11B   |
| INA      |
| RAB40C   |
| CACNG4   |

|          |
|----------|
| ITGA6    |
| GPR85    |
| SP1      |
| SLC16A2  |
| RERE     |
| CBX6     |
| RNF122   |
| AQP4     |
| FCHSD1   |
| C1orf21  |
| GAP43    |
| DYRK2    |
| ITPR1    |
| BCL11A   |
| PAX3     |
| RSBN1    |
| DNAJB9   |
| BCL2L11  |
| NOX4     |
| INSIG1   |
| GATA6    |
| RGS3     |
| CPEB4    |
| HIVEP1   |
| DPP10    |
| SMAD7    |
| PPP1R12A |
| HAND2    |
| PHF15    |
| SYNJ1    |
| SLC32A1  |
| PER2     |
| SMAD6    |
| TWIST1   |
| GOLGA3   |
| SESN3    |
| TRIO     |
| PIK3AP1  |
| PDE4D    |
| GLCE     |
| ARMC1    |
| CACNA1H  |
| EPC2     |
| SUV420H1 |
| C6orf62  |
| MYLIP    |
| KIF5B    |

hsa-miR-32

|            |          |
|------------|----------|
|            | RAB14    |
|            | NPC1     |
|            | HERC2    |
|            | ADAM23   |
|            | CNNM4    |
|            | PAIP1    |
|            | CTTNBP2  |
|            | FBXO33   |
|            | SDC2     |
|            | TAF15    |
|            | IRS2     |
|            | PHF3     |
|            | NELF     |
|            | NETO1    |
|            | PCDH10   |
|            | NOTCH1   |
|            | ZNF521   |
|            | PCDH9    |
|            | PRKAR2B  |
|            | TOP1     |
|            | SSBP3    |
|            | STAG2    |
|            | TBX3     |
|            | LRRC4    |
|            | CPEB1    |
|            | PLEKHM1  |
|            | ZDHHC21  |
|            | FSTL1    |
|            | LRRC20   |
|            | C18orf1  |
|            | ULK1     |
|            | NEGR1    |
|            | FBXO28   |
|            | CREB1    |
|            | PBX3     |
|            | MAP4K3   |
|            | RDH10    |
|            | FGF11    |
|            | KIAA1274 |
|            | PRRX1    |
|            | ULK2     |
|            | SCD      |
|            | ABCB9    |
|            | SYT7     |
|            | SCN4B    |
|            | GHR      |
|            | PAPPA    |
| hsa-miR-98 |          |

|              |             |          |
|--------------|-------------|----------|
|              |             | SLC16A14 |
|              |             | SEC24C   |
|              |             | COL4A2   |
|              |             | EPB41L4B |
|              |             | RECK     |
|              |             | PCDHA13  |
|              |             | PCDHA5   |
|              |             | PCDHA4   |
|              |             | PCDHA12  |
|              |             | PCDHA11  |
|              |             | PCDHA10  |
|              |             | PCDHAC2  |
|              |             | PCDHAC1  |
|              |             | PCDHA6   |
|              |             | PCDHA7   |
|              |             | PCDHA8   |
|              |             | PCDHA2   |
|              |             | PCDHA1   |
|              |             | PCDHA3   |
|              |             | PCDHA9   |
|              |             | ESRRA    |
|              |             | MAP4     |
|              |             | MAP2K1   |
|              |             | ADAMTSL3 |
|              |             | KCNJ2    |
|              |             | SPTLC1   |
|              |             | NLGN1    |
|              |             | KPNA4    |
|              |             | DEDD     |
|              |             | PDCD4    |
|              |             | FBXO21   |
|              |             | NFATC3   |
|              |             | ARL2     |
|              |             | CECR6    |
|              |             | CACNB1   |
|              |             | CLOCK    |
|              |             | CHORDC1  |
|              |             | ABCG4    |
|              |             | WDR47    |
|              |             | TGIF2    |
|              |             | ASPH     |
|              |             | SLC6A4   |
|              |             | ZNF423   |
|              |             | EIF4E    |
|              |             | KLC2     |
|              |             | WISP1    |
| <b>Sub 3</b> | hsa-miR-15b |          |

|              |            |          |
|--------------|------------|----------|
|              |            | TRIP10   |
|              |            | GRIN1    |
|              |            | MNT      |
| <b>Sub 4</b> | hsa-let-7f | SMARCAD1 |
|              |            | BZW1     |
|              |            | EIF2C3   |
|              |            | NPHP3    |
|              |            | TRIM41   |
|              |            | CYP19A1  |
|              |            | ZBTB5    |
|              |            | TGFBR1   |
|              |            | CCR7     |
|              |            | RGAG1    |
|              |            | EFHD2    |
|              |            | ADIPOR2  |
|              |            | NPEPL1   |
|              |            | SORCS1   |
|              | ETF1       |          |
|              | HAND1      |          |
|              | PCDH9      |          |
|              | CRIM1      |          |
|              | F13A1      |          |
|              | NR4A3      |          |
|              | ZMPSTE24   |          |
|              | ISL1       |          |
|              | CALU       |          |
|              | DAAMI      |          |
|              | CHFR       |          |
|              | RPRM       |          |
|              | HOXD8      |          |
|              | STIM2      |          |
|              | RASA1      |          |
|              | LPHN2      |          |
|              | SNIP1      |          |
|              | RNF141     |          |
|              | SRPR       |          |
|              | NRXN1      |          |
|              | ADCY3      |          |
|              | FMR1       |          |
|              | CCNT2      |          |
|              | EPHA4      |          |
|              | TPST1      |          |
|              | MAX        |          |
|              | UBE2G1     |          |
|              | ATP1B1     |          |
| KDELRL1      |            |          |



|  |  |        |
|--|--|--------|
|  |  | ADAM19 |
|  |  | SYN2   |
|  |  | CDH11  |
|  |  | MOSPD1 |
|  |  | PSD3   |
|  |  | BCL11B |
|  |  | MBNL1  |
|  |  | EEF2K  |
|  |  | MAP3K2 |
|  |  | MAP2   |
|  |  | PRKD1  |
|  |  | SP1    |
|  |  | CRKL   |
|  |  | BPIL1  |
|  |  | PGF    |
|  |  | N4BP1  |
|  |  | MYO1D  |
|  |  | HPCAL4 |
|  |  | HIC2   |

|              |                |      |
|--------------|----------------|------|
|              |                |      |
| <b>Sub 5</b> | hsa-miR-361-3p | None |
|              | hsa-miR-362-5p | None |
