# Supplementary material for: Analysis of potential roles of combinatorial microRNA regulation in occurrence of valvular heart disease with atrial fibrillation based on computational evidences
Source: PubMed Central journal article supplement (PMC6719876; doi:10.1371/journal.pone.0221900), 2019-09-03
Supplement: pone.0221900.s007.pdf [file pone.0221900.s007.pdf]

S7 Table The statistically enriched GO terms of Sub 2

| GO                                               | Style                  | Term                                                                          | Pvalue   | Gene count      | The involved genes                                                                                        |
|--------------------------------------------------|------------------------|-------------------------------------------------------------------------------|----------|-----------------|-----------------------------------------------------------------------------------------------------------|
| Biological processes                             | Metabolic              | positive regulation of RNA metabolic process                                  | 1.50E-10 | 155/424 (36.5%) | ARID1A,BCL11B,CTCF,ELK1,GATAG,KLF12,KLF13,KLF14,MK12,MES1,NOTCH1,PKNOX1 etc                               |
|                                                  |                        | positive regulation of macromolecule metabolic process                        | 4.00E-10 |                 | ARID1A,BCL11B,CTCF,ELK1,GATAG,KLF12,KLF13,KLF14,MK12,MES1,NOTCH1,PKNOX1,SMAD7,SOX9,SMARCA4,TRX3,ATXN1 etc |
|                                                  |                        | positive regulation of nitrogen compound metabolic process                    | 2.40E-09 |                 | TRX3,TEAD3,ZEB3,ABLNB,APP,ATXN1,BRPF1,CREB1,ESRRB,RYR1,GDF6,HAND2 etc                                     |
|                                                  |                        | negative regulation of nitrogen compound metabolic process                    | 1.60E-05 |                 | CTCF,DNMT3A,KLF12,KLF14,MES2,NRIF,NRHP1,SMAD7,SOX9,SMARCA4,TRX3,ATXN1 etc                                 |
|                                                  |                        | regulation of phosphorus metabolic process                                    | 2.40E-05 |                 | HMGR,KSR,SMAD6,SMAD7,ADCY6,APP,APLF2,ATXN1,CAV3,CCND1,CCND2,CCNT2,CDKSR1 etc                              |
|                                                  |                        | regulation of cellular protein metabolic process                              | 3.70E-05 |                 | NRHP1,SMAD6,SMAD7,TRIP9,BOLL,CCND1,CCND2,CPB1,CPEB1,DU,CL1 etc                                            |
|                                                  |                        | negative regulation of RNA metabolic process                                  | 7.20E-05 |                 | CTCF,DNMT3A,KLF12,KLF14,MES2,NRIF,NRHP1,SMAD7,SOX9,SMARCA4,TRX3,BAZ2A,CBFA2T1 etc                         |
|                                                  |                        | phosphorus metabolic process                                                  | 1.80E-04 |                 | MAR1,NRKSACM1,SMAD7,NRIF,APP,CREB1,CAMK1D,CAMK2G,CAV2,CTTNBP2 etc                                         |
|                                                  |                        | phosphate metabolic process                                                   | 1.80E-04 |                 | MAR1,NRKSACM1,SMAD7,NRIF,APP,CREB1,CAMK1D,CAMK2G,CAV2,CTTNBP2 etc                                         |
|                                                  |                        | negative regulation of macromolecule metabolic process                        | 2.20E-04 |                 | CTCF,DNMT3A,KLF12,KLF14,MES2,NRIF,NRHP1,SMAD6,SMAD7,SOX9,SMARCA4 etc                                      |
| positive regulation of protein metabolic process | 2.10E-02               | NRHP1,SMAD7,BOLL,CCND1,CCND2,DU,CL1,GAL1,GCL1,GDF6,GHR,HDAC4,PPARGC1A etc     |          |                 |                                                                                                           |
| regulation of glucose metabolic process          | 2.30E-02               | DYRK2,HDAC4,IRS1,PPARGC1A,PGAM1,TGFR1,IGFBP3,ZFP91 etc                        |          |                 |                                                                                                           |
| regulation of carbohydrate metabolic process     | 3.30E-02               | DYRK2,HDAC4,IRS1,PPARGC1A,PGAM1 etc                                           |          |                 |                                                                                                           |
| Biological processes                             | Transcription          | regulation of transcription from RNA polymerase II promoter                   | 1.20E-11 | 137/424 (32.3%) | BCL11B,DNMT3A,ELK1,GATAG,KLF12,KLF13,KLF14,MK12,MES1,NOTCH1,PKNOX1,PKNOX2 etc                             |
|                                                  |                        | positive regulation of transcription, DNA dependent                           | 1.10E-10 |                 | ABLNB,APP,ATXN1,CREB1,ESRRB,HAND2,HDAC4,JUNB,MITF,NEUROD1,NFAT5,NR2F1 etc                                 |
|                                                  |                        | regulation of transcription                                                   | 3.80E-10 |                 | BRF1,HDHR53,KLF12,KLF13,KLF14,MK12,MES1,MES2,NRIF,NRHP1,SMAD7,SOX9,SMARCA4,TRX3,ATXN1,BAZ2A etc           |
|                                                  |                        | positive regulation of transcription from RNA polymerase II promoter          | 4.20E-10 |                 | JUNB,MITF,NEUROD1,NFAT5,PA3,PPARGC1A,RARB,RXR,RUNX1,SRE,STAT5 etc                                         |
|                                                  |                        | positive regulation of transcription                                          | 7.60E-10 |                 | SF1,TRX3,TEAD3,ZEB3,ABLNB,APP,ATXN1,BRPF1,CREB1,ESRRB,GDF6 etc                                            |
|                                                  |                        | regulation of transcription, DNA dependent                                    | 2.20E-07 |                 | ARID1A,BCL11B,CTCF,DNMT3A,ELF5,ELK1,GATAG,KLF12,KLF13,KLF14,MK12 etc                                      |
|                                                  |                        | transcription                                                                 | 5.90E-07 |                 | ARID1A,BCL11B,CTCF,DNMT3A,ELF5,ELK1,GATAG,KLF12,KLF13,KLF14,MK12 etc                                      |
|                                                  |                        | negative regulation of transcription                                          | 7.60E-06 |                 | CTCF,DNMT3A,KLF12,KLF14,MES2,NRIF,NRHP1,SMAD7,SOX9,SMARCA4,TRX3,BAZ2A,CBFA2T1,DR1 etc                     |
|                                                  |                        | negative regulation of transcription, DNA dependent                           | 5.50E-05 |                 | CTCF,DNMT3A,KLF12,KLF14,MES2,NRIF,NRHP1,SMAD7,SOX9,SMARCA4,TRX3,BAZ2A,CBFA2T1,DR1 etc                     |
|                                                  |                        | positive regulation of gene specific transcription                            | 3.70E-04 |                 | GATAG,NOTCH1,SMARCA4,SMARCA4,CREB1,HDAC4,NR2F2,PPARGC1ASRE,TFEB,ETS1 etc                                  |
| Biological processes                             | Gene expression        | regulation of gene-specific transcription                                     | 1.00E-03 | 87/424 (20.5%)  | GATAG,NOTCH1,SMARCA4,SMARCA4,CREB1,HDAC4,SRE,TFEB,ETS1 etc                                                |
|                                                  |                        | positive regulation of specific transcription from RNA polymerase II promoter | 1.90E-03 |                 | GATAG,NOTCH1,SMAD7,SMARCA4,TAL1,CREB1,HDAC4,NR2F2,PPARGC1ASRE etc                                         |
|                                                  |                        | regulation of specific transcription from RNA polymerase II promoter          | 2.70E-03 |                 | GATAG,NOTCH1,SMAD7,SMARCA4,TAL1,CREB1,HDAC4,SRE,TFEB,ETS1 etc                                             |
|                                                  |                        | negative regulation of transcription from RNA polymerase II promoter          | 4.30E-03 |                 | GATAG,NOTCH1,SMAD7,SMARCA4,TAL1,CREB1,HDAC4,SRE,TFEB,ETS1 etc                                             |
|                                                  |                        | positive regulation of macromolecule biosynthetic process                     | 4.00E-09 |                 | DNMT3A,KLF12,MES1,SMAD7,SMARCA4,DR1,HDAC4,HDAC9,HYPI1,JARID1,NR2F2 etc                                    |
|                                                  |                        | positive regulation of biosynthetic process                                   | 4.00E-09 |                 | ARID1A,BCL11B,CTCF,ELK1,GATAG,KLF12,KLF13,KLF14,MK12,MES1,NOTCH1,PKNOX1 etc                               |
|                                                  |                        | positive regulation of cellular biosynthetic process                          | 6.70E-09 |                 | BCL11B,RRF1,CREB1,DYRK2,IRX1,GDF6,HAND2,HDAC4,IRS1,JUNB,MITF,NEUROD1 etc                                  |
|                                                  |                        | negative regulation of cellular biosynthetic process                          | 6.20E-06 |                 | NFAT5,NR2F2,PA3,PPARGC1A,RARB,RXR,RUNX1,SRE,STAT5,STRN3,THRB,TRF3 etc                                     |
|                                                  |                        | negative regulation of macromolecule biosynthetic process                     | 5.60E-06 |                 | DNMT3A,KLF12,KLF14,MES2,NRIF,NRHP1,SMAD7,SOX9,SMARCA4,TRX3,ATXN1,BAZ2A,CBFA2T1 etc                        |
|                                                  |                        | negative regulation of biosynthetic process                                   | 1.00E-05 |                 | NRIF,SMAD7,SOX9,SMARCA4,TRX3,ATXN1,BAZ2A,CBFA2T1,DR1,EDP,EIF2,CL,GCL1 etc                                 |
| Biological processes                             | Apoptosis              | positive regulation of gene expression                                        | 2.00E-09 | 43/424 (9.9%)   | ARID1A,BCL11B,CTCF,ELK1,GATAG,KLF12,KLF13,KLF14,MK12,MES2,NOTCH1 etc                                      |
|                                                  |                        | negative regulation of gene expression                                        | 8.50E-06 |                 | MES1,NRIF,NRHP1,SMAD7,SOX9,SMARCA4,TRX3,ATXN1,BAZ2A,CBFA2T1,DR1,EDP etc                                   |
|                                                  |                        | posttranscriptional regulation of gene expression                             | 1.10E-04 |                 | SMAD7,APP,BCL11,CPB1,CPEB1,EPF2,EIF4,EIF5,EIF71,IGFBP5,MEP9,NANOS1,PPARGC1A etc                           |
|                                                  |                        | regulation of gene expression, epigenetic                                     | 2.70E-03 |                 | ARID1A,CTCF,DNMT3A,SMARCA4,SMARCA4,ATXN1,BAZ2A,CBFA2T1,DR1,EDP etc                                        |
|                                                  |                        | positive regulation of apoptosis                                              | 2.90E-02 |                 | BRF1,CCL11,NOTCH1,TRIP3,ALDH1A1,APP,CDC82,DL1,CDP1,DYRK2,ING3 etc                                         |
|                                                  |                        | regulation of apoptosis                                                       | 2.50E-03 |                 | DUSP1,DYRK2,RYA1,GCL1,GHR,HSP1,ING3,MITF,MAP2K,NRIF,NEUROD1,PREX1,PPM1 etc                                |
|                                                  |                        | negative regulation of cell differentiation                                   | 1.50E-05 |                 | ARCA1,KLF4,NOTCH1,SMAD7,SOX9,TRX3,CCND1,CD86,EDP,HDAC4,HDAC9,NRIF,RRP1 etc                                |
|                                                  |                        | neuron differentiation                                                        | 4.90E-05 |                 | BD4,IFR1,MEP9,NRIF,NRHP1,NR2F2,OTX2,PA3,PAFAH1B1,EP3A,RAC1,SRE,CERS1B etc                                 |
|                                                  |                        | muscle cell differentiation                                                   | 1.00E-04 |                 | ADAM12,GATAG,MK12,APP,CACNA1H,CACNB2,CAV2,CAV3,MBNL1,MPP,OKRAB3B etc                                      |
|                                                  |                        | cell morphogenesis involved in differentiation                                | 2.40E-04 |                 | ATF1B1,BCL11B,NOTCH1,SOX9,APP,CREB1,CXCL12,CDK5R1,GAR3,LANE1,NRIF,NRHP1 etc                               |
| Biological processes                             | Differentiation        | cell morphogenesis involved in neuron differentiation                         | 3.10E-04 | 70/424 (16.5%)  | ATF1B1,BCL11B,NOTCH1,APP,CREB1,CXCL12,CDK5R1,GAR3,NRIF,NRHP1 etc                                          |
|                                                  |                        | regulation of myoblast cell differentiation                                   | 3.10E-04 |                 | NRHP1,TAL1,CD86,MITF,PURR,RUNX1,TFEB,ETS1,MAP3B,ZFP64 etc                                                 |
|                                                  |                        | striate muscle cell differentiation                                           | 1.70E-03 |                 | ADAM12,GATAG,APP,CACNA1H,CACNB2,CAV2,CAV3,MBNL1,MPP,OKRAB3B,TTN etc                                       |
|                                                  |                        | cerebellar granule cell differentiation                                       | 5.60E-03 |                 | ATF1B1,MEP9,SLK1                                                                                          |
|                                                  |                        | regulation of muscle cell differentiation                                     | 7.00E-03 |                 | NOTCH1,TRX3,CAV3,EP3B,HDAC4,SRE etc                                                                       |
|                                                  |                        | negative regulation of muscle cell differentiation                            | 1.30E-02 |                 | NOTCH1,TRX3,EP3B,HDAC4 etc                                                                                |
|                                                  |                        | regulation of striate muscle cell differentiation                             | 1.70E-02 |                 | NOTCH1,TRX3,CAV3,EP3B,HDAC4 etc                                                                           |
|                                                  |                        | regulation of erythrocyte differentiation                                     | 1.70E-02 |                 | TAL1,CD86,ETS1,MAP3B etc                                                                                  |
|                                                  |                        | positive regulation of cell differentiation                                   | 2.80E-02 |                 | GATAG,NOTCH1,TAL1,TGFB2,JUNB,JUND,NRIF,NEUROD1,RUNX1,SRE,SOC35 etc                                        |
|                                                  |                        | cardiac muscle cell differentiation                                           | 3.40E-02 |                 | GATAG,MAP3B,RYR1,TTN etc                                                                                  |
| Cellular component                               | Plasma membrane        | plasma membrane                                                               | 1.70E-03 | 237/336 (70.5%) | GATAG,MAP3B,RYR1,TTN etc                                                                                  |
|                                                  |                        | plasma membrane part                                                          | 2.50E-03 |                 | ADAM12,ADAM3,ABCA1,ATP2B2,ATP5V1B2,ATP1B1,ATP1B3,BCL2L11,HRM,CAP1 etc                                     |
|                                                  |                        | extrinsic to plasma membrane                                                  | 9.70E-03 |                 | CACNB2,CACNG4,CNRI,CAV2,CAV3,CLDN3,CTTNBP2,CDK5R1,CPEB1,DL1,DCBLD2,DAG1 etc                               |
|                                                  |                        | basal plasma membrane                                                         | 3.00E-02 |                 | SMAD7,CAV2,GNB1,GNL3,RAC1 etc                                                                             |
|                                                  |                        | internal side of plasma membrane                                              | 3.90E-02 |                 | CAV2,CTTNBP2,HRH2B,MT etc                                                                                 |
|                                                  |                        | vesicle membrane                                                              | 4.50E-05 |                 | RAB14,RAB9B,RAB40,RAF2,RAF1,APF1,CACNB2,CAV3,CDK5R1,DRD4 etc                                              |
|                                                  |                        | cytoplasmic vesicle membrane                                                  | 7.30E-05 |                 | SEC24,CACNG4,CAMK2G,CAV2,CTTNBP2,EPN2,GJA1,ITPR1,PHLDA1,SCAMP1,SLC32A1 etc                                |
|                                                  |                        | cytoplasmic vesicle part                                                      | 1.20E-04 |                 | CAMK2G,CAV2,CTTNBP2,EPN2,FGA,GJA1,ITPR1,PHLDA1,SCAMP1,SLC32A1,SVT1 etc                                    |
|                                                  |                        | membrane-bounded vesicle                                                      | 2.10E-03 |                 | ARCA1,ATP8V1B2,DNAK5,NOTCH1,RAB14,SB24C,AP51,APP,CACNG4,CAMK2G,CAV2 etc                                   |
|                                                  |                        | cytoplasmic membrane-bounded vesicle                                          | 2.70E-03 |                 | RAB14,SB24C,AP51,APP,CACNG4,CAMK2G,CAV2,CTTNBP2,EPN2,FGA,GJA1,ITPR1 etc                                   |
| Cellular component                               | Vesicle                | cytoplasmic vesicle                                                           | 3.10E-03 | 30/336 (8.9%)   | RAB14,SB24C,AP51,APP,CACNG4,CAMK2G,CAV2,CTTNBP2,EPN2,FGA,GJA1,ITPR1 etc                                   |
|                                                  |                        | vesicle                                                                       | 5.50E-03 |                 | CACNG4,CAMK2G,CAV2,CLDN3,CTTNBP2,EPN2,FGA,GJA1,ITPR1,MAP3B etc                                            |
|                                                  |                        | transport vesicle                                                             | 2.90E-02 |                 | RAB14,SB24C,AP51,CAV2,SVT1,VAMP2 etc                                                                      |
|                                                  |                        | coated vesicle membrane                                                       | 4.20E-02 |                 | SEC24,EPN2,SCAMP1,SLC32A1,SVT1,VAMP2 etc                                                                  |
|                                                  |                        | clathrin coated vesicle membrane                                              | 5.00E-02 |                 | EPN2,SCAMP1,SLC32A1,SVT1,VAMP2 etc                                                                        |
|                                                  |                        | transcription regulator activity                                              | 1.90E-09 |                 | ARBP2,ARID1A,BCL11A,CTCF,ELF5,ELK1,GATAG,HRP1,KLF12,KLF13,KLF14 etc                                       |
|                                                  |                        | RNA polymerase II transcription factor activity                               | 5.00E-08 |                 | PKNOX1,SOX12,SOX9,SF1,SP1,TRX3,TEAD3,CREB1,HDAC4,JUNB,JUND etc                                            |
|                                                  |                        | transcription factor activity                                                 | 3.10E-07 |                 | CTCF,ELF5,ELK1,GATAG,KLF12,KLF14,MES1,MES2,NRIF,NOTCH1,PKNOX1,PKNOX2 etc                                  |
|                                                  |                        | transcription repressor activity                                              | 7.20E-06 |                 | CTCF,ELF12,KLF4,MES1,NRIF,TRX3,ATXN1,CBFA2T1,DR1,EDP,EP3B,HDAC4 etc                                       |
|                                                  |                        | transcription activator activity                                              | 9.50E-05 |                 | ARID1A,CTCF,ELK1,GATAG,KLF14,MK12,NOTCH1,SOX9,SMARCA4,SMARCA4,SP1,TEAD3 etc                               |
| Molecular function                               | Transcription activity | specific RNA polymerase II transcription factor activity                      | 3.40E-04 | 90/408 (22.0%)  | MES1,PKNOX1,SOX9,CREB1,NR2F2,RXR,SRF,FOX etc                                                              |
|                                                  |                        | RNA polymerase II transcription factor activity, enhancer binding             | 7.10E-03 |                 | GATAG,PKNOX1,CREB1,MITF,PA3,TFAP4 etc                                                                     |
|                                                  |                        | transcription corepressor activity                                            | 1.60E-02 |                 | CBFA2T1,DR1,HDAC4,NRIF,NR2F2,THRB etc                                                                     |
|                                                  |                        | transcription cofactor activity                                               | 2.00E-02 |                 | ARBP2,BCL11A,CTCF,ELF12,MK12,SMARCA4,CREB1,CBFA2T1,DR1,HAND2 etc                                          |
|                                                  |                        | protein kinase activity                                                       | 3.60E-04 |                 | MAR1,NRKSACM1,CAMK1D,CAMK2G,CAV2,CTTNBP2,CCND1,CDK5R1,CD86,CD93,CHRM1,DYRK1A etc                          |
|                                                  |                        | protein serine/threonine kinase activity                                      | 4.90E-04 |                 | CAMK1D,CAMK2G,CDK5R1,CD93,DRK1,ADPRK1,PKM2,PKM3,MAP3B,MAP4K12,MAP4K13 etc                                 |
|                                                  |                        | protein tyrosine kinase activity                                              | 3.60E-02 |                 | CAV2,CTTNBP2,CREB1,DYRK2,MEP9,MAP2K,NR1,NR2F1,STK4,TTN etc                                                |
|                                                  |                        | metal ion binding                                                             | 3.60E-02 |                 | RPNT1,ADAM1,ADAM3,ADAM18,ADAM56,ADAM59,ADAM15L3,ARBP2,ATP1B2,ATP1B3 etc                                   |
|                                                  |                        | ion binding                                                                   | 3.90E-02 |                 | NOX4,NOTCH1,PAPPA,PHF15,PHF3,REX1,SEC24C,SNRKBSP1,SP2,TFAP15,ZEB3,ABLNB etc                               |
|                                                  |                        | inorganic ion binding                                                         | 4.70E-02 |                 | ATF1B1,MAR1,NRKSACM1,ADCY6,DYRK2,RYA1,RYA4,GCL1,CKM,PKM3,MAP3B,MTLK etc                                   |
