# Supplementary material for: Analysis of potential roles of combinatorial microRNA regulation in occurrence of valvular heart disease with atrial fibrillation based on computational evidences
Source: PubMed Central journal article supplement (PMC6719876; doi:10.1371/journal.pone.0221900), 2019-09-03
Supplement: pone.0221900.s008.pdf [file pone.0221900.s008.pdf]

**S8 Table The statistically enriched GO terms of Sub 3**

| GO                          | Style                  | Term                                                       | P-value  | Gene count       | The involved genes                                                                                                                                                                                                                                                                                                                                                                                                                                                                                                                                                                                                                                                                    |
|-----------------------------|------------------------|------------------------------------------------------------|----------|------------------|---------------------------------------------------------------------------------------------------------------------------------------------------------------------------------------------------------------------------------------------------------------------------------------------------------------------------------------------------------------------------------------------------------------------------------------------------------------------------------------------------------------------------------------------------------------------------------------------------------------------------------------------------------------------------------------|
| <b>Biological processes</b> | <b>Metabolic</b>       | positive regulation of nitrogen compound metabolic process | 2.40E-02 | 6/56             | GLOCKE5RRA,GRN1,MAP3K1,INFAT3,ZNF423                                                                                                                                                                                                                                                                                                                                                                                                                                                                                                                                                                                                                                                  |
|                             |                        | positive regulation of RNA metabolic process               | 3.50E-02 | (16.6%)          | GLOCKE5RRA,GRN1,MAP3K1,INFAT3                                                                                                                                                                                                                                                                                                                                                                                                                                                                                                                                                                                                                                                         |
|                             | <b>Regulation</b>      | homophilic cell adhesion                                   | 3.20E-11 |                  | PCDH11,PCDH12,PCDH10,PCDH13,PCDH15,PCDH16,PCDH17,PCDH18,PCDH19,PCDH20,PCDH21,PCDH22,PCDH23,PCDH24,PCDH25,PCDH26,PCDH27,PCDH28,PCDH29,PCDH30,PCDH31,PCDH32,PCDH33,PCDH34,PCDH35,PCDH36,PCDH37,PCDH38,PCDH39,PCDH40,PCDH41,PCDH42,PCDH43,PCDH44,PCDH45,PCDH46,PCDH47,PCDH48,PCDH49,PCDH50,PCDH51,PCDH52,PCDH53,PCDH54,PCDH55,PCDH56,PCDH57,PCDH58,PCDH59,PCDH60,PCDH61,PCDH62,PCDH63,PCDH64,PCDH65,PCDH66,PCDH67,PCDH68,PCDH69,PCDH70,PCDH71,PCDH72,PCDH73,PCDH74,PCDH75,PCDH76,PCDH77,PCDH78,PCDH79,PCDH80,PCDH81,PCDH82,PCDH83,PCDH84,PCDH85,PCDH86,PCDH87,PCDH88,PCDH89,PCDH90,PCDH91,PCDH92,PCDH93,PCDH94,PCDH95,PCDH96,PCDH97,PCDH98,PCDH99,PCDH100                                |
|                             |                        | cell-cell adhesion                                         | 1.20E-09 | 19/56            | NLGN1,PCDH11,PCDH12,PCDH13,PCDH14,PCDH15,PCDH16,PCDH17,PCDH18,PCDH19,PCDH20,PCDH21,PCDH22,PCDH23,PCDH24,PCDH25,PCDH26,PCDH27,PCDH28,PCDH29,PCDH30,PCDH31,PCDH32,PCDH33,PCDH34,PCDH35,PCDH36,PCDH37,PCDH38,PCDH39,PCDH40,PCDH41,PCDH42,PCDH43,PCDH44,PCDH45,PCDH46,PCDH47,PCDH48,PCDH49,PCDH50,PCDH51,PCDH52,PCDH53,PCDH54,PCDH55,PCDH56,PCDH57,PCDH58,PCDH59,PCDH60,PCDH61,PCDH62,PCDH63,PCDH64,PCDH65,PCDH66,PCDH67,PCDH68,PCDH69,PCDH70,PCDH71,PCDH72,PCDH73,PCDH74,PCDH75,PCDH76,PCDH77,PCDH78,PCDH79,PCDH80,PCDH81,PCDH82,PCDH83,PCDH84,PCDH85,PCDH86,PCDH87,PCDH88,PCDH89,PCDH90,PCDH91,PCDH92,PCDH93,PCDH94,PCDH95,PCDH96,PCDH97,PCDH98,PCDH99,PCDH100                          |
|                             |                        | cell adhesion                                              | 8.80E-07 | (52.7%)          | WISPI,NLGN1,PCDH11,PCDH12,PCDH13,PCDH14,PCDH15,PCDH16,PCDH17,PCDH18,PCDH19,PCDH20,PCDH21,PCDH22,PCDH23,PCDH24,PCDH25,PCDH26,PCDH27,PCDH28,PCDH29,PCDH30,PCDH31,PCDH32,PCDH33,PCDH34,PCDH35,PCDH36,PCDH37,PCDH38,PCDH39,PCDH40,PCDH41,PCDH42,PCDH43,PCDH44,PCDH45,PCDH46,PCDH47,PCDH48,PCDH49,PCDH50,PCDH51,PCDH52,PCDH53,PCDH54,PCDH55,PCDH56,PCDH57,PCDH58,PCDH59,PCDH60,PCDH61,PCDH62,PCDH63,PCDH64,PCDH65,PCDH66,PCDH67,PCDH68,PCDH69,PCDH70,PCDH71,PCDH72,PCDH73,PCDH74,PCDH75,PCDH76,PCDH77,PCDH78,PCDH79,PCDH80,PCDH81,PCDH82,PCDH83,PCDH84,PCDH85,PCDH86,PCDH87,PCDH88,PCDH89,PCDH90,PCDH91,PCDH92,PCDH93,PCDH94,PCDH95,PCDH96,PCDH97,PCDH98,PCDH99,PCDH100                    |
| <b>Cellular component</b>   | <b>Plasma membrane</b> | biological adhesion                                        | 8.90E-07 |                  | NLGN1,PCDH11,PCDH12,PCDH13,PCDH14,PCDH15,PCDH16,PCDH17,PCDH18,PCDH19,PCDH20,PCDH21,PCDH22,PCDH23,PCDH24,PCDH25,PCDH26,PCDH27,PCDH28,PCDH29,PCDH30,PCDH31,PCDH32,PCDH33,PCDH34,PCDH35,PCDH36,PCDH37,PCDH38,PCDH39,PCDH40,PCDH41,PCDH42,PCDH43,PCDH44,PCDH45,PCDH46,PCDH47,PCDH48,PCDH49,PCDH50,PCDH51,PCDH52,PCDH53,PCDH54,PCDH55,PCDH56,PCDH57,PCDH58,PCDH59,PCDH60,PCDH61,PCDH62,PCDH63,PCDH64,PCDH65,PCDH66,PCDH67,PCDH68,PCDH69,PCDH70,PCDH71,PCDH72,PCDH73,PCDH74,PCDH75,PCDH76,PCDH77,PCDH78,PCDH79,PCDH80,PCDH81,PCDH82,PCDH83,PCDH84,PCDH85,PCDH86,PCDH87,PCDH88,PCDH89,PCDH90,PCDH91,PCDH92,PCDH93,PCDH94,PCDH95,PCDH96,PCDH97,PCDH98,PCDH99,PCDH100                          |
|                             |                        | integral to plasma membrane                                | 8.80E-05 |                  | GRN1,NLGN1,KCNJ2,PCDH11,PCDH12,PCDH13,PCDH14,PCDH15,PCDH16,PCDH17,PCDH18,PCDH19,PCDH20,PCDH21,PCDH22,PCDH23,PCDH24,PCDH25,PCDH26,PCDH27,PCDH28,PCDH29,PCDH30,PCDH31,PCDH32,PCDH33,PCDH34,PCDH35,PCDH36,PCDH37,PCDH38,PCDH39,PCDH40,PCDH41,PCDH42,PCDH43,PCDH44,PCDH45,PCDH46,PCDH47,PCDH48,PCDH49,PCDH50,PCDH51,PCDH52,PCDH53,PCDH54,PCDH55,PCDH56,PCDH57,PCDH58,PCDH59,PCDH60,PCDH61,PCDH62,PCDH63,PCDH64,PCDH65,PCDH66,PCDH67,PCDH68,PCDH69,PCDH70,PCDH71,PCDH72,PCDH73,PCDH74,PCDH75,PCDH76,PCDH77,PCDH78,PCDH79,PCDH80,PCDH81,PCDH82,PCDH83,PCDH84,PCDH85,PCDH86,PCDH87,PCDH88,PCDH89,PCDH90,PCDH91,PCDH92,PCDH93,PCDH94,PCDH95,PCDH96,PCDH97,PCDH98,PCDH99,PCDH100               |
|                             |                        | intrinsic to plasma membrane                               | 1.10E-04 | 27/53            | GRN1,NLGN1,KCNJ2,PCDH11,PCDH12,PCDH13,PCDH14,PCDH15,PCDH16,PCDH17,PCDH18,PCDH19,PCDH20,PCDH21,PCDH22,PCDH23,PCDH24,PCDH25,PCDH26,PCDH27,PCDH28,PCDH29,PCDH30,PCDH31,PCDH32,PCDH33,PCDH34,PCDH35,PCDH36,PCDH37,PCDH38,PCDH39,PCDH40,PCDH41,PCDH42,PCDH43,PCDH44,PCDH45,PCDH46,PCDH47,PCDH48,PCDH49,PCDH50,PCDH51,PCDH52,PCDH53,PCDH54,PCDH55,PCDH56,PCDH57,PCDH58,PCDH59,PCDH60,PCDH61,PCDH62,PCDH63,PCDH64,PCDH65,PCDH66,PCDH67,PCDH68,PCDH69,PCDH70,PCDH71,PCDH72,PCDH73,PCDH74,PCDH75,PCDH76,PCDH77,PCDH78,PCDH79,PCDH80,PCDH81,PCDH82,PCDH83,PCDH84,PCDH85,PCDH86,PCDH87,PCDH88,PCDH89,PCDH90,PCDH91,PCDH92,PCDH93,PCDH94,PCDH95,PCDH96,PCDH97,PCDH98,PCDH99,PCDH100               |
|                             |                        | plasma membrane                                            | 4.40E-03 | (81.8%)          | CACNB1,GRN1,MAP3K1,NLGN1,KCNJ2,PCDH11,PCDH12,PCDH13,PCDH14,PCDH15,PCDH16,PCDH17,PCDH18,PCDH19,PCDH20,PCDH21,PCDH22,PCDH23,PCDH24,PCDH25,PCDH26,PCDH27,PCDH28,PCDH29,PCDH30,PCDH31,PCDH32,PCDH33,PCDH34,PCDH35,PCDH36,PCDH37,PCDH38,PCDH39,PCDH40,PCDH41,PCDH42,PCDH43,PCDH44,PCDH45,PCDH46,PCDH47,PCDH48,PCDH49,PCDH50,PCDH51,PCDH52,PCDH53,PCDH54,PCDH55,PCDH56,PCDH57,PCDH58,PCDH59,PCDH60,PCDH61,PCDH62,PCDH63,PCDH64,PCDH65,PCDH66,PCDH67,PCDH68,PCDH69,PCDH70,PCDH71,PCDH72,PCDH73,PCDH74,PCDH75,PCDH76,PCDH77,PCDH78,PCDH79,PCDH80,PCDH81,PCDH82,PCDH83,PCDH84,PCDH85,PCDH86,PCDH87,PCDH88,PCDH89,PCDH90,PCDH91,PCDH92,PCDH93,PCDH94,PCDH95,PCDH96,PCDH97,PCDH98,PCDH99,PCDH100 |
|                             |                        | plasma membrane part                                       | 5.00E-03 |                  | CACNB1,GRN1,MAP3K1,NLGN1,KCNJ2,PCDH11,PCDH12,PCDH13,PCDH14,PCDH15,PCDH16,PCDH17,PCDH18,PCDH19,PCDH20,PCDH21,PCDH22,PCDH23,PCDH24,PCDH25,PCDH26,PCDH27,PCDH28,PCDH29,PCDH30,PCDH31,PCDH32,PCDH33,PCDH34,PCDH35,PCDH36,PCDH37,PCDH38,PCDH39,PCDH40,PCDH41,PCDH42,PCDH43,PCDH44,PCDH45,PCDH46,PCDH47,PCDH48,PCDH49,PCDH50,PCDH51,PCDH52,PCDH53,PCDH54,PCDH55,PCDH56,PCDH57,PCDH58,PCDH59,PCDH60,PCDH61,PCDH62,PCDH63,PCDH64,PCDH65,PCDH66,PCDH67,PCDH68,PCDH69,PCDH70,PCDH71,PCDH72,PCDH73,PCDH74,PCDH75,PCDH76,PCDH77,PCDH78,PCDH79,PCDH80,PCDH81,PCDH82,PCDH83,PCDH84,PCDH85,PCDH86,PCDH87,PCDH88,PCDH89,PCDH90,PCDH91,PCDH92,PCDH93,PCDH94,PCDH95,PCDH96,PCDH97,PCDH98,PCDH99,PCDH100 |
| <b>Molecular function</b>   | <b>Ion binding</b>     | calcium ion binding                                        | 7.10E-06 | 18/39<br>(46.1%) | ASPM,CACNB1,GRN1,PCDH11,PCDH12,PCDH13,PCDH14,PCDH15,PCDH16,PCDH17,PCDH18,PCDH19,PCDH20,PCDH21,PCDH22,PCDH23,PCDH24,PCDH25,PCDH26,PCDH27,PCDH28,PCDH29,PCDH30,PCDH31,PCDH32,PCDH33,PCDH34,PCDH35,PCDH36,PCDH37,PCDH38,PCDH39,PCDH40,PCDH41,PCDH42,PCDH43,PCDH44,PCDH45,PCDH46,PCDH47,PCDH48,PCDH49,PCDH50,PCDH51,PCDH52,PCDH53,PCDH54,PCDH55,PCDH56,PCDH57,PCDH58,PCDH59,PCDH60,PCDH61,PCDH62,PCDH63,PCDH64,PCDH65,PCDH66,PCDH67,PCDH68,PCDH69,PCDH70,PCDH71,PCDH72,PCDH73,PCDH74,PCDH75,PCDH76,PCDH77,PCDH78,PCDH79,PCDH80,PCDH81,PCDH82,PCDH83,PCDH84,PCDH85,PCDH86,PCDH87,PCDH88,PCDH89,PCDH90,PCDH91,PCDH92,PCDH93,PCDH94,PCDH95,PCDH96,PCDH97,PCDH98,PCDH99,PCDH100               |
