# Supplementary material for: Analysis of potential roles of combinatorial microRNA regulation in occurrence of valvular heart disease with atrial fibrillation based on computational evidences
Source: PubMed Central journal article supplement (PMC6719876; doi:10.1371/journal.pone.0221900), 2019-09-03
Supplement: pone.0221900.s009.pdf [file pone.0221900.s009.pdf]

S9 Table The statistically enriched GO terms of Sub 4

| GO                          | Style                  | Term                                                      | Pvalue   | Gene count      | The involved genes                               |
|-----------------------------|------------------------|-----------------------------------------------------------|----------|-----------------|--------------------------------------------------|
| <b>Biological processes</b> | <b>Transcription</b>   | positive regulation of transcription                      | 2.00E-02 | 7/53            | BCL11B,ISL1,SMARCA41,SP1,HAND1,NR4A3,TCFBR1      |
|                             |                        | positive regulation of gene expression                    | 2.50E-02 | (13.2%)         | BCL11B,ISL1,SMARCA41,SP1,HAND1,NR4A3,TCFBR1      |
|                             | <b>Biosynthetic</b>    | positive regulation of macromolecule biosynthetic process | 3.90E-02 | 7/53            | BCL11B,ISL1,SMARCA41,SP1,HAND1,NR4A3,TCFBR1      |
|                             |                        | positive regulation of cellular biosynthetic process      | 4.70E-02 | (13.2%)         | BCL11B,ISL1,SMARCA41,SP1,HAND1,NR4A3,TCFBR1      |
|                             |                        | positive regulation of biosynthetic process               | 4.90E-02 |                 | BCL11B,ISL1,SMARCA41,SP1,HAND1,NR4A3,TCFBR1      |
|                             | <b>Gene expression</b> | positive regulation of transcription                      | 2.00E-02 | 7/53<br>(13.2%) | BCL11B,ISL1,SMARCA41,SP1,HAND1,NR4A3,TCFBR1      |
| <b>Molecular function</b>   | <b>Ion binding</b>     | metal ion binding                                         | 5.70E-03 |                 | ADAM19,BCL11B,CHFR,EEF2K,NR4A3,ZBTB5,RNF141, etc |
|                             |                        | cation binding                                            | 6.60E-03 | 28/56           | ADAM19,BCL11B,CHFR,EEF2K,NR4A3,ZBTB5,RNF141, etc |
|                             |                        | ion binding                                               | 8.20E-03 | (46.1%)         | ADAM19,BCL11B,CHFR,EEF2K,NR4A3,ZBTB5,RNF141, etc |
|                             |                        |                                                           |          |                 |                                                  |
