# Supplementary material for: Analysis of potential roles of combinatorial microRNA regulation in occurrence of valvular heart disease with atrial fibrillation based on computational evidences
Source: PLoS One. 2019 Sep 3;14(9):e0221900. doi: 10.1371/journal.pone.0221900 (PMC6719876; doi:10.1371/journal.pone.0221900)
Supplement: S2 Table — (PDF) [file pone.0221900.s002.pdf]

S2 Table The normalized PCC among pairwise of 47 DE miRNAs

VHD:

[illegible]

The PCCs are always equal to 1 on the diagonal line because the expression values of miRNAs pairwise there are same

AF-VHD:

[illegible]

The PCCs are always equal to 1 on the diagonal line because the expression values of miRNAs pairwise there are same

The serial numbers in the row and column of Table S2 that denote the symbols of miRNAs correspond to those of Table S1.
