# Supplementary material for: Analysis of potential roles of combinatorial microRNA regulation in occurrence of valvular heart disease with atrial fibrillation based on computational evidences
Source: PLoS One. 2019 Sep 3;14(9):e0221900. doi: 10.1371/journal.pone.0221900 (PMC6719876; doi:10.1371/journal.pone.0221900)
Supplement: S6 Table — (PDF) [file pone.0221900.s006.pdf]

S6 Table The statistically enriched GO terms of Sub 1

| GO                   | Style                  | Term                                                                                         | Pvalue   | Gene count        | The involved genes                                                                                              |
|----------------------|------------------------|----------------------------------------------------------------------------------------------|----------|-------------------|-----------------------------------------------------------------------------------------------------------------|
| Biological processes | Metabolic              | regulation of RNA metabolic process                                                          | 1.20E-10 |                   | SLA2,TB34,TAL1,TBPL1,TSC22D4,WDT1,ATXN7L3,BAZZA,ABL1,CALCR,CD32 etc                                             |
|                      |                        | positive regulation of RNA metabolic process                                                 | 3.20E-09 |                   | E2F3,SLA1,FOSL1,KLF12,MKL2,MBS2,POU4F2,PRDM6,RBM15,SATB2,SOX4,SMARCD1 etc                                       |
|                      |                        | positive regulation of macromolecule metabolic process                                       | 2.70E-08 |                   | NTF1,APR4,PP4B,PPARGC1A,PPARGC1B,PPARGC1A,PPARGC1B,PPARGC1A,PPARGC1B,PPARGC1A,PPARGC1B etc                      |
|                      |                        | negative regulation of RNA metabolic process                                                 | 4.40E-07 |                   | E2F6,JAZF1,DP2,KLF12,MKD4,MBS2,PRB21A,POU4F2,PRDM1,PRDM6,PAWR etc                                               |
|                      |                        | positive regulation of nucleobase, nucleoside, nucleotide and nucleic acid metabolic process | 7.70E-07 |                   | ARID1A,EP300,E2F3,ELK1,FOSL1,KLF12,MKD4,MBS2,POU4F2,PRDM6,RBM15 etc                                             |
|                      |                        | negative regulation of macromolecule metabolic process                                       | 1.80E-06 |                   | ARID1A,EP300,E2F3,ELK1,FOSL1,KLF12,MKD4,MBS2,POU4F2,PRDM6 etc                                                   |
|                      |                        | positive regulation of nitrogen compound metabolic process                                   | 2.10E-06 |                   | ARID1A,EP300,E2F3,ELK1,FOSL1,KLF12,MKD4,MBS2,POU4F2,PRDM6 etc                                                   |
|                      |                        | phosphorus metabolic process                                                                 | 1.50E-05 |                   | BCL2,E2F3,PRB2,GAB1,NR61,PAN3,CDK1,PDB1,SAACML1,SRF1,SNRK,SPB2,TAOK2,TYR03 etc                                  |
|                      |                        | phosphate metabolic process                                                                  | 1.50E-05 |                   | CSFR,CDSK1,CDK1,ELK1,E2F3,PRB2,PRB2,PRB2,PRB2,PRB2,PRB2,PRB2,PRB2,PRB2,PRB2 etc                                 |
|                      |                        | negative regulation of nucleobase, nucleoside, nucleotide and nucleic acid metabolic process | 2.30E-05 | 270662<br>(40.7%) | ATP8B1,E2F6,JAZF1,DP2,KLF12,MKD4,MBS2,PRB21A,POU4F2,PRDM1,PRDM6 etc                                             |
|                      |                        | negative regulation of nitrogen compound metabolic process                                   | 3.30E-05 |                   | ATP8B1,E2F6,JAZF1,DP2,KLF12,MKD4,MBS2,PRB21A,POU4F2,PRDM1,PRDM6 etc                                             |
|                      |                        | regulation of cellular protein metabolic process                                             | 1.00E-03 |                   | ADAMP,BCL2,CD28,EP300,GAB1,KITLG,GRB1C1,TIMP3,BTRC,BOLL,CASC3,CPEB1 etc                                         |
|                      |                        | regulation of cellular carbohydrate metabolic process                                        | 9.70E-03 |                   | HDAC4,NSR,B51,JGFI,NR3C1,PPARGC1A,PLXK                                                                          |
|                      |                        | regulation of carbohydrate metabolic process                                                 | 1.10E-02 |                   | HDAC4,NSR,B51,JGFI,NR3C1,PPARGC1A,PLXK                                                                          |
|                      |                        | regulation of phosphorus metabolic process                                                   | 1.40E-02 |                   | ADAMP,BCL2,GAB1,KITLG,GRB1C1,SHB,BP5,TAOK2,ADCTV,CAMK2,CAV5,CHRM1 etc                                           |
|                      |                        | regulation of phosphate metabolic process                                                    | 1.40E-02 |                   | ADAMP,BCL2,GAB1,KITLG,GRB1C1,SHB,BP5,TAOK2,ADCTV,CAMK2,CAV5,CHRM1 etc                                           |
|                      |                        | positive regulation of protein metabolic process                                             | 1.60E-02 |                   | ADAMP,BCL2,CD28,EP300,KITLG,GRB1C1,BTRC,BOLL,EP300,GAB1,HDAC4                                                   |
|                      |                        | positive regulation of cellular protein metabolic process                                    | 2.00E-02 |                   | ADAMP,BCL2,CD28,EP300,KITLG,GRB1C1,BTRC,BOLL,EP300,GAB1,HDAC4                                                   |
|                      |                        | regulation of glucose metabolic process                                                      | 2.60E-02 |                   | HDAC4,NSR,B51,JGFI,NR3C1,PPARGC1A                                                                               |
|                      |                        | collagen metabolic process                                                                   | 4.60E-02 |                   | EPH2,ARHG20,AMP,SEMA3A,SEMA4F                                                                                   |
| Biological processes | Transcription          | regulation of transcription                                                                  | 8.00E-15 |                   | AFY,AFY,ARID1A,ARID1A,ARID1A,ATP8B1,BCL11A,BCL11A,BCL11A,BCL11A,BCL11A,BCL11A,BCL11A,BCL11A etc                 |
|                      |                        | transcription                                                                                | 1.70E-13 |                   | KLF12,MNT,MDA1,MKL2,MAX,MBS1,PRB21A,POU4F2,PRDM1,PRDM6,PRDM16,PAWR etc                                          |
|                      |                        | regulation of transcription from RNA polymerase II promoter                                  | 1.10E-11 |                   | EP300,E2F6,ELF2,ELK1,FOSL1,JAZF1,DP2,KLF12,MKD4,MBS2,MBS2 etc                                                   |
|                      |                        | regulation of transcription, DNA-dependent                                                   | 1.80E-10 |                   | ETV1,FOXO1,FOXO1,FOXO1,FOXO1,FOXO1,FOXO1,FOXO1,FOXO1,FOXO1,FOXO1,FOXO1,FOXO1,FOXO1 etc                          |
|                      |                        | positive regulation of transcription, DNA-dependent                                          | 2.30E-09 |                   | POU4F2,PRDM6,RBM15,SATB2,SOX4,SMARCD1,PPARGC1A,PPARGC1B,PPARGC1A,PPARGC1B,PPARGC1A,PPARGC1B etc                 |
|                      |                        | positive regulation of transcription from RNA polymerase II promoter                         | 4.30E-08 |                   | JGFI,JUN,MAMU1,MET1,MAPK1,ANTIR1,NR1H2,NR1H2,NR1H2,NR1H2,NR1H2,NR1H2,NR1H2,NR1H2 etc                            |
|                      |                        | positive regulation of transcription                                                         | 1.30E-07 | 242602<br>(36.5%) | ARID1A,EP300,E2F3,ELK1,FOSL1,KLF12,MKD4,MBS2,POU4F2,PRDM6,RBM15 etc                                             |
|                      |                        | negative regulation of transcription from RNA polymerase II promoter                         | 2.60E-07 |                   | E2F3,JAZF1,DP2,KLF12,MKD4,MBS2,PRB21A,POU4F2,PRDM1,PRDM6,PAWR etc                                               |
|                      |                        | negative regulation of transcription, DNA-dependent                                          | 2.80E-07 |                   | ATXN7L3,BCL11A,CAMK2,CD2,CLOCK,CBR1,CBR2,EP300,E2F3,PRB2,PRB2,PRB2,PRB2,PRB2,PRB2,PRB2,PRB2 etc                 |
|                      |                        | negative regulation of transcription                                                         | 1.20E-06 |                   | ATP8B1,E2F6,JAZF1,DP2,KLF12,MKD4,MBS2,PRB21A,POU4F2,PRDM1,PRDM6 etc                                             |
|                      | Biosynthetic           | transcription from RNA polymerase II promoter                                                | 3.00E-05 |                   | ATF4,E2F3,FOSL1,MNT,MAPK1,PRDM4,TARDP,TRB1,ASHL1,CD22,CBR1,CNT2 etc                                             |
|                      |                        | regulation of gene-specific transcription                                                    | 5.90E-03 |                   | RBM15,TAL1,WDT1,HDAC4,JGFI,NR02,NR2F2,NR2F2,NR2F2,NR2F2,NR2F2,NR2F2,NR2F2,NR2F2 etc                             |
|                      |                        | chromatin-mediated maintenance of transcription                                              | 1.30E-02 |                   | ARID1A,SMARCD1,MLL4                                                                                             |
|                      |                        | regulation of specific transcription from RNA polymerase II promoter                         | 4.00E-02 |                   | RBM15,TAL1,WDT1,HDAC4,NR02,PPARGC1A,PPARGC1A,PPARGC1A,PPARGC1A,PPARGC1A,PPARGC1A,PPARGC1A,PPARGC1A etc          |
|                      |                        | negative regulation of specific transcription from RNA polymerase II promoter                | 4.80E-02 |                   | RBM15,WDT1,HDAC4,NR02,PPARGC1A,PPARGC1A,PPARGC1A,PPARGC1A,PPARGC1A,PPARGC1A,PPARGC1A,PPARGC1A etc               |
|                      |                        | positive regulation of biosynthetic process                                                  | 5.70E-09 |                   | ARID1A,CD28,EP300,E2F3,ELK1,FOSL1,KITLG,GRB1C1,MKL2,MBS2,POU4F2,PRDM16 etc                                      |
|                      |                        | positive regulation of macromolecule biosynthetic process                                    | 5.70E-09 |                   | ARID1A,CD28,EP300,E2F3,ELK1,FOSL1,KITLG,GRB1C1,MKL2,MBS2,POU4F2,PRDM16 etc                                      |
|                      |                        | positive regulation of cellular biosynthetic process                                         | 6.20E-08 |                   | E2F3,E2F3,FOXO1,FOXO1,FOXO1,FOXO1,FOXO1,FOXO1,FOXO1,FOXO1,FOXO1,FOXO1,FOXO1,FOXO1 etc                           |
|                      |                        | negative regulation of macromolecule biosynthetic process                                    | 1.40E-06 | 123602<br>(18.2%) | ATP8B1,E2F6,JAZF1,DP2,KLF12,MKD4,MBS2,PRB21A,POU4F2,PRDM1,PRDM6,PAWR etc                                        |
|                      |                        | negative regulation of biosynthetic process                                                  | 2.50E-06 |                   | ATP8B1,E2F6,JAZF1,DP2,KLF12,MKD4,MBS2,PRB21A,POU4F2,PRDM1,PRDM6,PAWR etc                                        |
|                      |                        | negative regulation of cellular biosynthetic process                                         | 6.30E-06 |                   | ATP8B1,E2F6,JAZF1,DP2,KLF12,MKD4,MBS2,PRB21A,POU4F2,PRDM1,PRDM6,PAWR etc                                        |
| Biological processes | Gene expression        | RNA biosynthetic process                                                                     | 6.40E-04 |                   | ATF4,E2F3,FOSL1,MNT,MAPK1,PRDM4,TARDP,TRB1,ASHL1,CD22,CBR1,CNT2,ELK2 etc                                        |
|                      |                        | negative regulation of receptor biosynthetic process                                         | 2.20E-02 |                   | SLC1A2,SLC1A3,SLC7A10                                                                                           |
|                      |                        | positive regulation of gene expression                                                       | 2.80E-08 |                   | MAPK1,MAPK1,MAMU1,NR1H2,NR1H2,NR1H2,NR1H2,NR1H2,NR1H2,NR1H2,NR1H2,NR1H2,NR1H2,NR1H2 etc                         |
|                      |                        | negative regulation of gene expression                                                       | 4.30E-08 | 116662<br>(17.5%) | EP301,E2F3,FOXO1,FOXO1,FOXO1,FOXO1,FOXO1,FOXO1,FOXO1,FOXO1,FOXO1,FOXO1,FOXO1,FOXO1 etc                          |
|                      |                        | posttranscriptional regulation of gene expression                                            | 6.60E-04 |                   | MKL2,SPB2,ACTA1,CAV5,DMD,GRB3,FOXO1,FOXO1,FOXO1,FOXO1,FOXO1,FOXO1,FOXO1,FOXO1 etc                               |
|                      |                        | positive regulation of gene expression, epigenetic                                           | 4.30E-02 |                   | ARID1A,SMARCD1,MLL4                                                                                             |
|                      |                        | regulation of apoptosis                                                                      | 7.00E-05 |                   | ARID1A,CDK1A,CTD,AMSR1,FOXO2,FURIN,PRB2,PRB2,PRB2,PRB2,PRB2,PRB2,PRB2,PRB2 etc                                  |
|                      |                        | regulation of programmed cell death                                                          | 9.40E-05 |                   | ADAMP,BCL2,BTG1,GRB3,BCL2L1,BTNPL1,CD3G,DPF2,EPH4,FOSL1,GCH1 etc                                                |
|                      |                        | regulation of cell death                                                                     | 1.00E-04 |                   | MAP3K5,MKL1,NET1,NR1H2,NR1H2,NR1H2,NR1H2,NR1H2,NR1H2,NR1H2,NR1H2,NR1H2,NR1H2,NR1H2 etc                          |
|                      |                        | positive regulation of apoptosis                                                             | 1.10E-03 |                   | FOSL1,GCH1,PAWR,ARHG21,ARHG21,ARHG21,ARHG21,ARHG21,ARHG21,ARHG21,ARHG21,ARHG21,ARHG21 etc                       |
|                      | Apoptosis              | positive regulation of programmed cell death                                                 | 1.30E-03 | 81602<br>(12.2%)  | BCL2L1,BTNPL1,BTNPL1,BTNPL1,BTNPL1,BTNPL1,BTNPL1,BTNPL1,BTNPL1,BTNPL1,BTNPL1,BTNPL1,BTNPL1 etc                  |
|                      |                        | positive regulation of cell death                                                            | 1.40E-03 |                   | BCL2L1,BTNPL1,BTNPL1,BTNPL1,BTNPL1,BTNPL1,BTNPL1,BTNPL1,BTNPL1,BTNPL1,BTNPL1,BTNPL1,BTNPL1 etc                  |
|                      |                        | induction of apoptosis                                                                       | 7.70E-03 |                   | BCL2L1,BTNPL1,BTNPL1,BTNPL1,BTNPL1,BTNPL1,BTNPL1,BTNPL1,BTNPL1,BTNPL1,BTNPL1,BTNPL1,BTNPL1 etc                  |
|                      |                        | induction of programmed cell death                                                           | 8.00E-03 |                   | CUL3,CBN1,ACTA1,FOXO1,FOXO1,FOXO1,FOXO1,FOXO1,FOXO1,FOXO1,FOXO1,FOXO1,FOXO1,FOXO1 etc                           |
|                      |                        | regulation of neuron apoptosis                                                               | 1.20E-02 |                   | ADAMP,BCL2L1,BTNPL1,BTNPL1,BTNPL1,BTNPL1,BTNPL1,BTNPL1,BTNPL1,BTNPL1,BTNPL1,BTNPL1,BTNPL1 etc                   |
|                      |                        | apoptosis                                                                                    | 4.30E-02 |                   | BCL2L1,BTNPL1,BTNPL1,BTNPL1,BTNPL1,BTNPL1,BTNPL1,BTNPL1,BTNPL1,BTNPL1,BTNPL1,BTNPL1,BTNPL1 etc                  |
|                      |                        | cell morphogenesis involved in neuron differentiation                                        | 5.70E-04 |                   | NDR1,JPRK4,PRKCA,PTN11,PTN11,PTN11,PTN11,PTN11,PTN11,PTN11,PTN11,PTN11,PTN11,PTN11 etc                          |
|                      |                        | cell morphogenesis involved in neuron differentiation                                        | 8.50E-04 |                   | NDR1,JPRK4,PRKCA,PTN11,PTN11,PTN11,PTN11,PTN11,PTN11,PTN11,PTN11,PTN11,PTN11,PTN11 etc                          |
|                      |                        | regulation of myeloid cell differentiation                                                   | 5.40E-04 |                   | KITLG,PRDM6,RBM15,TAL1,MAPK1,PRB2,PRB2,PRB2,PRB2,PRB2,PRB2,PRB2,PRB2,PRB2,PRB2,PRB2,PRB2 etc                    |
|                      |                        | neuron differentiation                                                                       | 8.40E-04 |                   | POU4F2,BDNF,CNTN1,CDK1,CDK1,CDK1,CDK1,CDK1,CDK1,CDK1,CDK1,CDK1,CDK1,CDK1,CDK1 etc                               |
| Cellular component   | Differentiation        | central nervous system neuron differentiation                                                | 2.90E-03 |                   | EPH2,CDK1,FOXO1,FOXO1,FOXO1,FOXO1,FOXO1,FOXO1,FOXO1,FOXO1,FOXO1,FOXO1,FOXO1,FOXO1 etc                           |
|                      |                        | fat cell differentiation                                                                     | 3.90E-03 |                   | PRDM6,ADRB1,PPARG,PPARGC1A,PPARGC1A,PPARGC1A,PPARGC1A,PPARGC1A,PPARGC1A,PPARGC1A,PPARGC1A,PPARGC1A,PPARGC1A etc |
|                      |                        | positive regulation of cell differentiation                                                  | 4.20E-03 | 77602<br>(11.0%)  | BCL2L1,BTNPL1,BTNPL1,BTNPL1,BTNPL1,BTNPL1,BTNPL1,BTNPL1,BTNPL1,BTNPL1,BTNPL1,BTNPL1,BTNPL1 etc                  |
|                      |                        | negative regulation of cell differentiation                                                  | 4.60E-03 |                   | EPH2,PRDM6,RBM15,ARHG20A,BDNF,CDK2,CNTN4,FOXO1,FOXO1,FOXO1,FOXO1,FOXO1,FOXO1,FOXO1,FOXO1 etc                    |
|                      |                        | brown fat cell differentiation                                                               | 5.40E-03 |                   | PRDM6,ADRB1,PPARG,PPARGC1A,PPARGC1A,PPARGC1A,PPARGC1A,PPARGC1A,PPARGC1A,PPARGC1A,PPARGC1A,PPARGC1A,PPARGC1A etc |
|                      |                        | tracheobronchial cell differentiation                                                        | 6.40E-03 |                   | SP1,SP1,CDK2,CDK2,CDK2,CDK2,CDK2,CDK2,CDK2,CDK2,CDK2,CDK2,CDK2,CDK2 etc                                         |
|                      |                        | regulation of neuron differentiation                                                         | 1.30E-02 |                   | GAB1,WDT1,ADCTV,GRB2,NSR,B51,JUNB,PRKCA,PTN11,PTN11                                                             |
|                      |                        | positive regulation of erythrocyte differentiation                                           | 1.40E-02 |                   | TAL1,MAPK1,4SMAP1,ETN1                                                                                          |
|                      |                        | positive regulation of myeloid cell differentiation                                          | 2.10E-02 |                   | KITLG,CLL1,MAPK1,4SMAP1,ETN1                                                                                    |
|                      |                        | plasma membrane part                                                                         | 3.00E-06 |                   | ADAMP,ATP2A2,ATP2B1,ATP2A2,ATP2B1,ATP2A2,ATP2B1,ATP2A2,ATP2B1,ATP2A2,ATP2B1,ATP2A2,ATP2B1 etc                   |
| Cellular component   | Plasma membrane        | plasma membrane                                                                              | 3.00E-04 |                   | ADAMP,ATP2A2,ATP2B1,ATP2A2,ATP2B1,ATP2A2,ATP2B1,ATP2A2,ATP2B1,ATP2A2,ATP2B1,ATP2A2,ATP2B1 etc                   |
|                      |                        | integral to plasma membrane                                                                  | 6.20E-04 | 197540<br>(36.4%) | ADRB1,ACCN1,CALCR,CERS,CHRM1,CSFR,DRD2,DRD2,DRD2,DRD2,DRD2,DRD2,DRD2,DRD2,DRD2,DRD2,DRD2,DRD2 etc               |
|                      |                        | intracellular to plasma membrane                                                             | 7.40E-04 |                   | CLL1,E2F6,GABRA4,GABRA5,GABRA5,GABRA5,GABRA5,GABRA5,GABRA5,GABRA5,GABRA5,GABRA5,GABRA5 etc                      |
|                      |                        | internal side of plasma membrane                                                             | 1.50E-02 |                   | BCL2L1,CADPS,FRMPD1,RAB15,RAB38,RAB38,RAB38,RAB38,RAB38,RAB38,RAB38,RAB38,RAB38,RAB38 etc                       |
|                      |                        | external side of plasma membrane                                                             | 2.80E-02 |                   | ADAMP,ATP2A2,CD28,CD28,CD28,CD28,CD28,CD28,CD28,CD28,CD28,CD28,CD28,CD28 etc                                    |
|                      |                        | cytoplasmic vesicle                                                                          | 3.90E-05 |                   | CAMP5,DEND1A,ACCH1,NR1H2,RAB11,ARAB8,RAB38,RAC,GAP1,SLA2,TAOK2 etc                                              |
|                      |                        | vesicle                                                                                      | 5.80E-05 |                   | CAMP5,DEND1A,ACCH1,NR1H2,RAB11,ARAB8,RAB38,RAC,GAP1,SLA2,TAOK2 etc                                              |
|                      |                        | membrane-bounded vesicle                                                                     | 9.90E-04 |                   | DEND1A,RAB11,ARAB8,RAB38,RAC,GAP1,SLA2,TAOK2,AP2A1,AP4E1,BECN1 etc                                              |
|                      |                        | cytoplasmic membrane-bounded vesicle                                                         | 1.00E-03 |                   | BDNF,BDNF,CALCR,CAMK2,CALC,CLT,SLA2,TAOK2,AP2A1,AP4E1,BECN1 etc                                                 |
|                      |                        | transport vesicle                                                                            | 1.70E-03 |                   | RAB11,AP2A1,CLT,TAURIN,PPARGC1A,PPARGC1A,PPARGC1A,PPARGC1A,PPARGC1A,PPARGC1A,PPARGC1A,PPARGC1A etc              |
|                      | Vesicle                | trans-Golgi network transport vesicle                                                        | 2.90E-03 |                   | AP2A1,CLT,TAURIN,PPARGC1A,PPARGC1A,PPARGC1A,PPARGC1A,PPARGC1A,PPARGC1A,PPARGC1A,PPARGC1A,PPARGC1A,PPARGC1A etc  |
|                      |                        | Golgi-associated vesicle                                                                     | 5.30E-03 |                   | AP2A1,AP4E1,CLT,TAURIN,PPARGC1A,PPARGC1A,PPARGC1A,PPARGC1A,PPARGC1A,PPARGC1A,PPARGC1A,PPARGC1A,PPARGC1A etc     |
|                      |                        | clathrin-coated vesicle membrane                                                             | 6.50E-03 | 51540<br>(9.4%)   | DEND1A,AP2A1,CLT,TAURIN,SCAMP1,SV2A,STY1,VAMP2                                                                  |
|                      |                        | clathrin-coated vesicle                                                                      | 9.90E-03 |                   | DEND1A,AP2A1,AP4E1,CLT,TAURIN,PPARGC1A,PPARGC1A,PPARGC1A,PPARGC1A,PPARGC1A,PPARGC1A,PPARGC1A,PPARGC1A etc       |
|                      |                        | vesicle membrane                                                                             | 1.10E-02 |                   | DEND1A,AP2A1,AP4E1,CLT,TAURIN,PPARGC1A,PPARGC1A,PPARGC1A,PPARGC1A,PPARGC1A,PPARGC1A,PPARGC1A,PPARGC1A etc       |
|                      |                        | coated vesicle membrane                                                                      | 1.10E-02 |                   | DEND1A,AP2A1,AP4E1,CLT,TAURIN,PPARGC1A,PPARGC1A,PPARGC1A,PPARGC1A,PPARGC1A,PPARGC1A,PPARGC1A,PPARGC1A etc       |
|                      |                        | coated vesicle                                                                               | 1.70E-02 |                   | DEND1A,AP2A1,AP4E1,CLT,TAURIN,PPARGC1A,PPARGC1A,PPARGC1A,PPARGC1A,PPARGC1A,PPARGC1A,PPARGC1A,PPARGC1A etc       |
|                      |                        | transport vesicle membrane                                                                   | 2.20E-02 |                   | AP2A1,CLT,TAURIN,PPARGC1A,PPARGC1A,PPARGC1A,PPARGC1A,PPARGC1A,PPARGC1A,PPARGC1A,PPARGC1A,PPARGC1A,PPARGC1A etc  |
|                      |                        | cytoplasmic vesicle part                                                                     | 2.70E-02 |                   | DEND1A,AP2A1,AP4E1,CLT,TAURIN,PPARGC1A,PPARGC1A,PPARGC1A,PPARGC1A,PPARGC1A,PPARGC1A,PPARGC1A,PPARGC1A etc       |
|                      |                        | Golgi-associated vesicle membrane                                                            | 3.20E-02 |                   | AP2A1,AP4E1,CLT,TAURIN,PPARGC1A,PPARGC1A,PPARGC1A,PPARGC1A,PPARGC1A,PPARGC1A,PPARGC1A,PPARGC1A,PPARGC1A etc     |
| Molecular function   | Transcription activity | cytoplasmic vesicle membrane                                                                 | 3.30E-02 |                   | DEND1A,AP2A1,AP4E1,CLT,TAURIN,PPARGC1A,PPARGC1A,PPARGC1A,PPARGC1A,PPARGC1A,PPARGC1A,PPARGC1A,PPARGC1A etc       |
|                      |                        | transcription regulator activity                                                             | 2.70E-15 |                   | ATF4, ARID1A, ARID1A, BCL11A, BCL2, BTG1, BACH1, BACH2, EP300, E2F3 etc                                         |
|                      |                        | transcription factor activity                                                                | 8.30E-11 |                   | ATF4, ARID1A, ARID1A, BCL11A, BCL2, BTG1, BACH1, BACH2, EP300, E2F3 etc                                         |
|                      |                        | transcription activator activity                                                             | 7.30E-07 |                   | ARID1A, BCL2, EP300, E2F3, ELK1, FOSL1, MNT, MKL2, MAX, POU3F1, PRDM16 etc                                      |
|                      |                        | transcription repressor activity                                                             | 5.00E-06 | 148639<br>(23.1%) | BCL11A, E2F6, ELF2, JAZF1, DP2, KLF12, MNT, MKL2, MBS2, PRDM16, PAWR, SETD8, SP3 etc                            |
|                      |                        | RNA polymerase II transcription factor activity                                              | 2.30E-05 |                   | MBS1, MBS2, PRDM16, SOD12, TRP1, ASH1, CBR1, CD3, ELK2, FOSM1, GTF2B etc                                        |
|                      |                        | transcription coactivator activity                                                           | 9.50E-05 |                   | BTG1, EP300, E2F6, JAZF1, KLF12, MNT, MKD4, MBS2, PAWR, SETD8, CD22, JUNB, MECP2, NCOR2 etc                     |
|                      |                        | transcription corepressor activity                                                           | 2.50E-04 |                   | BCL11A, E2F6, JAZF1, KLF12, MNT, MKD4, MBS2, PAWR, SETD8, CD22, JUNB, MECP2, NCOR2 etc                          |
|                      |                        | transcription coactivator activity                                                           | 3.30E-02 |                   | EPH4F, EPH2, TYR03, CSFR1, EPNA1, FGFR1, FLT1, NSR, B51, E2F6, NR2F, PRGRB etc                                  |
|                      |                        | transmembrane receptor protein tyrosine kinase activity                                      | 8.40E-05 |                   | AKAP9, AAK1, EPHA7, EPH2, NRK, PAN3, CDK16, PDK1L, SNRK, TAOK2, TYR03 etc                                       |
| Kinase activity      | Kinase activity        | protein kinase activity                                                                      | 9.70E-05 |                   | AKAP9, AAK1, NSR, CDK16, PDK1L, SNRK, SPB2, TAOK2, CAMK2D, CAMK2C, CSNK1G1, CSNK1G3 etc                         |
|                      |                        | protein serine/threonine kinase activity                                                     | 6.80E-03 | 57602<br>(8.6%)   | EPH4F, EPH2, TYR03, ARID1A, CAMK2D, CSFR1, EPNA1, FGFR1, FLT1, NSR, B51, E2F6, NR2F, PRGRB etc                  |
|                      |                        | protein tyrosine kinase activity                                                             | 7.20E-03 |                   | SHB,BP5, CDKN1A, PRKCA, SFN, SOCS1, SOCS3, TRB2                                                                 |
|                      |                        | protein kinase inhibitor activity                                                            | 7.40E-03 |                   | SHB,BP5, CDKN1A, PRKCA, SFN, SOCS1, SOCS3, TRB2                                                                 |
|                      |                        | kinase inhibitor activity                                                                    | 8.40E-03 |                   | SHB,BP5, CDKN1A, PRKCA, SFN, SOCS1, SOCS3, TRB2                                                                 |
|                      |                        | protein kinase regulator activity                                                            | 1.70E-02 |                   | SHB,BP5, CDKN1A, PRKCA, SFN, SOCS1, SOCS3, TRB2, ERBB3                                                          |
|                      |                        | kinase regulator activity                                                                    | 3.80E-02 |                   | SHB,BP5, CDKN1A, PRKCA, SFN, SOCS1, SOCS3, TRB2, ERBB3                                                          |
|                      |                        | zinc ion binding                                                                             | 3.90E-02 | 151639<br>(20.5%) | NTSE, ADAM19, ADAM2, ADAMP, ADAMT18, ADAMT19, BCL11A, DPF2, EP300, FRS1,FRS1 etc                                |
|                      | Ion binding            | zinc ion binding                                                                             | 3.90E-02 |                   | NTSE, ADAM19, ADAM2, ADAMP, ADAMT18, ADAMT19, BCL11A, DPF2, EP300, FRS1,FRS1 etc                                |
|                      |                        | zinc ion binding                                                                             | 3.90E-02 |                   | NTSE, ADAM19, ADAM2, ADAMP, ADAMT18, ADAMT19, BCL11A, DPF2, EP300, FRS1,FRS1 etc                                |
